# Supplementary material for: Isolation and Characterization of Microsatellite Loci for the Isopod Crustacean Armadillidium vulgare and Transferability in Terrestrial Isopods
Source: PLoS One. 2013 Oct 3;8(10):e76639. doi: 10.1371/journal.pone.0076639 (PMC3789670; doi:10.1371/journal.pone.0076639)
Supplement: Table S1 — Information on the 146 microsatellite loci from Armadillidium vulgare tested for inclusion in multiplex kits. For each locus the following information is provided: locus name, repeat motif, repeat number, reference sequence, forward primer, reverse primer, PCR product size in reference sequence, and results of experimental tests leading to final selection for three multiplex kits. (XLSX) [file pone.0076639.s001.xlsx]

## Sheet: Table S1
Locus name	Repeat motif	Repeat number	Reference sequence	Forward primer 5'>3'	Reverse primer 5'>3'	PCR product size in reference sequence	Initial evaluation in 2 individuals	Number of alleles (polymorphism test) in 24-individual panel	Inclusion in multiplex kits (primer labelling)
AV0001	ac	13	AAAACAGTCTTTTCTTCCACACAAACACCTTCAAACGTAGCAAGGAAAAATCATATTATTACAAGCGCATTATACATACATAAATACATACATACATCATACATACACAAATACACATTCAGACGAacacacacacacacacacacacacacTTTAAAATTTCCTCCTCAAGAAGCCTAACTTCTATTTAACCTAAATTTTTCTGGCTACAATTCAACTACAAACTTAAAAAATAACGGACAGCAGCTAGTACGTTTTT	CATACACAAATACACATTCAGACGA	TTAAATAGAAGTTAGGCTTCTTGAGGA	90	failed
AV0002	actccg	5	CGACTCCGACTCCGAATGTGACTACAACTCTAACTACAACTGCAactccgactccgactccgactccgactccgACTACAACTCCGACTCCGACTACAACTCAAACTACAACTCCATCTATCCTCTAACTCCATCTTTAATGCGAGCTATTTAATCGATTTGTAGTGATGAGTGATAGACTCTGCGTCCGTTAATGCAGTTATTAAAAGTCAATATGGCGTCCTTGCCTGGAGTTAAAAGCCTAATTTATTGAATTTACTCATTTGATGATAAAATCGTACATGTCGGAatatatatACATATATGCACATGTGTACACTCAGGGCACATCCGTACACACAGGGCACATGCGTACACTTACCAATGTATAGAGtatatataT	CGACTCCGACTCCGAATG	TTCCGACATGTACGATTTTATCA	290	passed	4	kit #2 (6_FAM)
AV0003	ag	13	GTGCCATCAAAAGATACCATATGAGCAAAAGAGGAATAAGCAGAGTTACAGTTGACATTATTTTGCAAAATGCCTTAAATGGCTTGATGAAGAGGAACCAGAGAGATTTTTGAATTTACGACGGAGAAATTCTTAAGCTGTTATTTGCATTATTCCGGGATGAAATATAGGTTGAATGAGTTTCTGAATTTTGAAGATGACGGTAagagagagagagagagagagagagagATCAATAAATTATTTTGTTATTCAACCAGTTTGAATCTTATTTCAGTG	ACGACGGAGAAATTCTTAAGCTG	TCAAACTGGTTGAATAACAAAATAA	148	failed
AV0004	tgtcgt	10	GTCTGTTTAGAATTCCGAAATTTTCTTTTCCCTTCAGTTAGTCGAATTACTTGCTGATCTGGATGGGATTTCGAGGTGAGGTCATAACCACCTTGTGAAATTTCAAAAACTCATCATCTTCACATCTCCCTATTGTCATAGCCTTTGTCGTTGTCATTAACGTTGTAGTTGAATCtgtcgttgtcgttgtcgttgtcgttgtcgttgtcgttgtcgttgtcgttgtcgttgtcgtTGTCGCTGTCGTTGTCGTTGTCATTGTCATTGTCGTTGTCGCTGTCATTGTCATTGAATTTGTCGTCGTCGTTATC	CACATCTCCCTATTGTCATAGCC	ATGACAACGACAACGACAGC	139	failed
AV0005	ga	5	AGGTCCTACAGGATGTGCATAAATGGGAGAGGAGGAGGACACAAAATAATCATGGGAGATATGAATATTCTTGTTTGAGTGAGGAgaggaggaggagAGGAgaggaggaggagAGGAGGAGGAgaggaggaggagAGGAgaggaggaggagAGGCTGCTGTTGGAGCTTTTGGAATAAGAACAAGAAATATAGAAGgagagagagaTTGGTGGACTTTGCCATAAGAAATAACGTAGTGATTATGAACACCTTTTTTAAACATGAGGAGAGTAAGAAATGGACATAGTACCGATGGAATTCAGAAGACGAGGAATACGACGGAAAAAATTTANAGATAGATTTAATGATGAGTAATAGGTAAAAAGAATGTTACCAGGAATAGTAAAAAAAG	AGGCTGCTGTTGGAGCTTT	ATCACTACGTTATTTCTTATGGCAA	90	failed
AV0006	tc	5	CTACGAGCAAAGCAAACTTTCACCAAACGTTGAGTGACGTCATAAGTTTTCATTCAATCAAATTATCTCTTACAATCGTTAGGCGGAGCTAATGCTATAAAATATGACGTCATACTCAGTACACAAtctctctctcTAGTTTTCAACGGTCGGATGTTACGTCATTTGGTTTCCAATTCTGCCATAGAATCTGTCTGCACCCACCCACACGCCCTTTCATTCTCGTCATTCGAAGAGTACACAAGCACTCACCCACACTcacacacaATTACGCGTacacacacacacacTTACGTACACTCGCAAGCACACGAAAGTACATATACAAACAGTAAAC	ACGAGCAAAGCAAACTTTCA	AGTGTGGGTGAGTGCTTGTG	257	failed
AV0007	gt	8	AGTGCGGATGCGGATGAGGATGTTGAATTTTCGAAAATGCGGATGCGGATGTTGAATTTTCGCAAGTGCAGATGTCATCACTAATGTAtgtgtgtgtgtgtgtgtgtgAAGGTCACGAAATCGATTCCTGGTAAAGTTTCCCTCCTCGATGAAAAGCAATGCCCGTGAAGGTGGGATAAATAAATATATCCCTATTTCCCAACCGATAAATTACAACCTCCCTTGGGAGGGTCGAGAAAGGTTTCTCGTGGGGGACAGTGGAACCCAGGCTCTTTCAATTTTTGTCTCCC	GGATGCGGATGTTGAATTTT	CAGGAATCGATTTCGTGACC	90	failed
AV0008	tg	9	ATTCGTGTAATGGAATACTGTAATCCTTTTTTCTTTGGTCCATTTCTTTCCAAGCCTTTCGAAGATTCCTTATTAATCAATCCCATTtgtgtgtgtgtgtgtgtgTTCATTTGTGTTTATCATCTTCTATTCTATGAAGATATGCTTTAAGTGTTTTAAGTGATGTGTTTCTATATTCCATTGAGGACCTCGAAATCT	TGGTCCATTTCTTTCCAAGC	CACATCACTTAAAACACTTAAAGCA	132	failed
AV0009	tg	5	CGCAATGTAGTCATATAATTTTGTGTGCATACGCGTGTTtgtgtgtgtgTATGTATGTGTATACGACACGCGTGAGCGAACTTTGTCAATAATTTACGCCAAACTCTAAAAGATTGAAAACACCCCCACCCTACCCCCcacacacacacacaCTACAAAAACTTCCCTAACCCCCAAAAAAAGAAAAGAAAAGAGCTACCAATATAATAGATGATAAGATCGGGACTAATGAAAGTTAGATATAAATGAAAGTTAGACGAAACTAATGAAAGTTAGACAGAATAATGAAAGTTAAACCAACATTAGGAGCAGCAGTAGTATCGGAATATTGACGAGCCGATAACATTTCTAATATCATTTGATATTTCTTCTCGAATCTCAATTCCATATCTCG	GCAATGTAGTCATATAATTTTGTGTGC	TTTCAATCTTTTAGAGTTTGGCG	118	passed	2	no
AV0010	tct	7	CATTCAAATAGCAGGTACACAACATAATATAACTTTAATACCACTCAGCATCAACAGAACAATATCCCTCTTTGAAAGTCTTCAGTTACCATAAACAAAATCATCATAATCACCATCACTAtcttcttcttcttcttcttctCCTTAGGAATCTTCTCCTTCGGAATCTTCTTCCTCGGTATCTTCTCCTTCAG	CATTCAAATAGCAGGTACACAACA	TGAAGGAGAAGATACCGAGGA	193	failed
AV0011	ca	9	CGGCGCCAAGCTTGGATGTAATAATATCTGGAGACACACTTACCGTAGCAAATGGGGGGCAGGTCCCTTCCACCGATTCCGCTGATCAGGAAAAAAATAGGTGATCTTTTATTATCTGCATATTTACATGTACATTTTAAATTAGACAATATACAAATACTTTAGACAAAGATGCATTTTAGAAATTTTGcacacacacacacacacaCCGTCCTTTACCTAAATTGTGAGTTGATTTTCAATTGCCTATTGAGTCATAAGATTAGTTATGATGCTTGTCG	CAAAGATGCATTTTAGAAATTTTGC	AACTAATCTTATGACTCAATAGGCAAT	102	failed
AV0012	tc	5	CATTCCCATTTCTTCCTGGCTACTCTCCTCTCCTGCATCCTCTCTAGATGTTCTCACCACCTCAGTCTGGCTGCGTCCATTTTATTCAGTGTGGCCTTCACTCTAACCTCTTCTCTTATCCTTTCGTTtctctctctcTGTCTGTTCTGGTATTTCCCAATATCGTTCTTAGTATTCATTTCCGCCGACCGTATTCTACTATCCACCCAAGTGGTCGTGCTCCATGTCTCTGCTCCGTATAGTAGAATTGGTGTTAACACATTCTCAAATGTTACCTTCTTCACTTTCGCATTTATTACTCTATTTTTCAGTATGGGATGCACTGCTCTCACAGCTCCCCAGTACTGAGTTATCTTGTCTTTTTTTAAGTTCTAC	GTTCTCACCACCTCAGTCTGG	TACGGAGCAGAGACATGGAG	190	passed	1
AV0013	ga	7	ATTGAGCATAAAGGTTAAGTCAGGGACCAGAAAAAGGATTAGACTGTGTAGAAAGGCGTGTCGCATTAGCCCTTCTCAGTGGAAGAGGTATTCTACTAGAGAGTTCAGAAGACCAATGTCCGTTGTAATGCTGATAGTATGgagagagagagagaAAGAGATGCAACAATTCAAAGGGTAGAAAGTGGAAAAAGTTAGTGAGAACAAGAGAGATGAAAAGCTCTAGACTCCATCATTTAAAGGAGAGCTGTATGAGTGGAACCA	CTGTGTAGAAAGGCGTGTCG	TTCTACCCTTTGAATTGTTGCAT	140	passed	1
AV0014	gga	5	tgttgttgttgtCGTCTTTTAAAACCtgttgttgttgttgttgttgttgttgttgttgtTGCTGTATTTCATTCTTTTCTGTGGTGGAAGGAGGGggaggaggaggaggaGAAGATTTGAGAAGGGAAGTAGAGGTAGTGGAAGATGGTTTGAGAAAACGTAGGTTATTGAATTCTACATTAAATATTCTTCTATACATTTGGTAATTACCGTAAGGACGATCTAAAACGCGACAGTTCTTAACATAGTCTCTATGTAGATCTTTCATACTCTTACTACCGTCTATGAAAAATCGTTTGGGGGACGTCGTCGACGACGTTG	GCTGTATTTCATTCTTTTCTGTGG	GACTATGTTAAGAACTGTCGCGTT	190	passed	2	no
AV0015	ac	5	CTCATTTAAAGAAAGAAATTAAAGCAATATTATTTacacacacacATACTCTCCTGGGAACCAATTATCAGGAATATTTGGTGACTACGGAATTCCTTGTTCTTATTATTTATTTGTTATGGCAATTGGTGCTATGCATGAGCAAATGCTGAACCTTTTTGATGTAGATTCTGTAGATCCCCTAAAATCAGCTACACACTCACAAacacacacacTCACTCTCACTCatatatatatatatatatTAGTGATGGATCGGATGTCAT	CTCATTTAAAGAAAGAAATTAAAGCAA	GCACCAATTGCCATAACAAA	132	failed
AV0016	tc	5	CACACACGAGCGCTCACATGcatacatacatacataAACACGcacacacaTTAGAAAGAATGAACCCAACAAACAGAACACTTCATTCTATATAATCTCCACAATCGTTTTCAGTTACGAAAAATTTTCTACAATGTACAGCATTTACTCGCCTTATATGTAATATGGCTCTCAAAACAACTGCTCTTTANCTGGTTCTTAGTCACATCAAACACCCACATGAAAAAACTGCTCATTTATGATCTCGTCGCTATCACAATGGTCACAGCTCACCAGAACAATGAGTTtctctctctcCTTTCTTGAAGATCAACCACGTGGGAGTCATTATTCTACTCTATTTTACTTGTTTTTCCACTTCTTTACTCTTAAC	GCTCATTTATGATCTCGTCGC	CTCCCACGTGGTTGATCTTC	94	passed	6	kit #2 (6_FAM)
AV0017	tg	7	ACTCCCTTACGACTCTCCTTTATCCATTCTTTGTTGCCTTCGTGTATGTGTGGGAATTTTGAGCAACAGTTGCGTGTATGTATGTGTATGTTTGTGTCATTGTTATAATGCACATATTTGACACTCCAATTTAAAGTGATATTAGGGGTGAGTGGAGGTAATTGGATGGATCTAGATAGTAGAtgtgtgtgtgtgtgGTGGGGGTGGGGGGTATGATCGAGGGTAGGGAGGAGAA	AGGGGTGAGTGGAGGTAATTG	TTCTCCTCCCTACCCTCGAT	92	failed
AV0018	caa	6	GAAGAAATTCAAACTTCACCATCATTATCAACAATACcaacaacaacaacaacaaAAATTTTGCTCATAAGACTATAGATGTTATTCGTAAGTCTGTTCAAAGTAATTTAAAATGCTTATTTGGATAAACAGAGTAAGAAGAAAGAGTCGAACGAAAACGACCTGGGTAAAAATATAACAGAAGCTCCAAAAATCTGCGAAGGAAAAGGACAAAGTCTGTGTT	GAAGAAATTCAAACTTCACCATCA	CTTTGAACAGACTTACGAATAACATC	103	passed	4	kit #2 (HEX)
AV0019	ag	8	GAGTAAGTGAGAAAGTGAGAGAGTGAAATTCATATATGACCAGTGTGACGAAATAAAGAAATCAGAATGAAAATGAGTGACAAagagagagagagagagCGTGCTAACAGCCTATCGCGTATGAGTTAGGAGCTACACATAAAGCAAGCGTGAGGATCTGCGAGGATCAGAGCTCTCTGTGGATGGGGTAAAGGGTGAGTAGGTGTCGAGAGCATAATCCTCAGTCTAATCTCATCGTAGTTTCATGTGCCTGCCCCAAGCGATTACGTATATGTGTGCATGTA	ACCAGTGTGACGAAATAAAGAAA	TCTGATCCTCGCAGATCCTC	133	failed
AV0020	gtt	14	CTATTTTCAGTGAACTTAAAGCAGTGGTCTGATAATTTTGAGTGATATAAAAGCTATTTTCTGCTGTTGCTGTCATAGACATCAAAGAGATCTTttgttgttgttgttgttgttgttgttgttgttgttgttgttgTTATGATTATCAGAAATGTATATTACAATAACTGAGTGTAATAATCTTTCTGACTGATGACAGACAGAAAAGTGTCATGAGTACTTTTCTACTTAATTAACTACTTATTTTATTATGTATGAGAGTGGGTTTGGGGGTCGGGTGGGGGTGGAGACACATTCTAGTTAAAAAAGATGCAAAGTATAATCAGTGATTCTTTTGTTGTTGT	TGAACTTAAAGCAGTGGTCTGA	CAAACCCACTCTCATACATAATAAAA	259	failed
AV0021	ag	12	ACCATCAGGACCGTACGTTTTCTAAGTGTTAAGCTCagagagagagagagagagagagagCAGAAATAATATCTTCAGAAGAAATTACAATTTTAGGCATAAATGAGTTAGAGGGGGTTGAAGGCTTGATCCAGCTGGTG	CCATCAGGACCGTACGTTTT	GCCTTCAACCCCCTCTAACT	124	passed	1
AV0022	ca	6	AGAGAAAAGACAAAATGTCGATATGCATATACATTATAAATTTcacacacacacaTACATCCTCAGACTCTTCTTAATTAAGCTTGAAGTCTGACTAATTTTCATCACCAATTATCATTCAGATATCGTTGGTCGGCCTTAGAGGAACTAACACTAAGTCTTTCTAATATTTCTTAATGGTTCAGAGAAAAAATGATCGTCTTCAATCCCTACAAAAACTCAGATCCTTCATCTATATATTCGATATAATCTCG	GAGAAAAGACAAAATGTCGATATGC	TCTAAGGCCGACCAACGATA	142	failed
AV0023	ag	6	tatatataTTGCTTGGTGGAGGAGTACATGAGGGAAGGACTAGAAAAAGGTGGAATTTATGTTTGGAGAGGGCTGTTTTGAAAATGAATAAGGAAAAGACTGTATTTGTGAGAGTAAATagagagagagagATAGAGAAAATTTGGATATCAAACTTGAAAGGAGTCTTTACCGAAAACTCGACATGCCCTTTTACATAGCCTCATCCTTTCACTGTTCAACTCGCCGACCCCAGACTTAACCTCTATGCTCATTCTTACGTGTACTTATCTGGTAAAGTGTGGAACACACTCTCTTTATTTCTTTTTCCAACTTTCTTTGACCTACATACCTTCAAACAACGTGTATCGCAC	TGGAATTTATGTTTGGAGAGGG	GAGGTTAAGTCTGGGGTCGG	195	passed	3	kit #1 (HEX)
AV0024	ag	7	TGTCCAATCTTGCAGAATTTCAGAGAGAAAATTGTTGGTTCCAAGATATAAAATCCAAGGTCATGTGCCCATAATGTGCTTCAGGAAAAGATCATTCGATTAGCAGTCGAAATCGGGTGACAGAGAACGACGAGCATTGCGAAAGATTGTGACAAAATATAAGAGAACAACAGCTGCAAGAACAGTGATTAGGGAACTCTGTATTCATGGGAGTGCTGCAATCGCCAAATCTTTGTAAACGACATAGATGTAAGAAAGTGGANagagagagagagagTGGTGCATATCTCATAGGGATTGAGCTGCCAGATAATGTAAAGATACGTCCTTTA	AAATCGGGTGACAGAGAACG	GGCAGCTCAATCCCTATGAG	198	passed	2	no
AV0025	tg	8	CGTTCATAGATTTAAGGATCCCATGCACCCGATCATGCGTAATTACAGGCAGAGCAGTGAACGCGACTCACCAGTGAAGGTTATACGTCGTACCACCAAGAAGGAAAAATACTGCTTTTCAAATAATCATAAGTTTAAGACAAGTATATGCGCTAGCCGAGAGCGCTAGTGATGCTCTTCAtgtgtgtgtgtgtgtgAGCGTGAATAAGTCTGATATTTTGTGTCTTGTACCTATGGAGGTTAGTGCTTTTGAGGTTTGTGTGATTGAGA	CAAGTATATGCGCTAGCCGAG	CCTCAAAAGCACTAACCTCCA	115	failed
AV0026	aag	7	AGATAAATGTCAGCAATATAACTTGTATGTGCCAATTAGCAGAAGCCTTAGAGAATAAAGATGAAATGGAAGATTCTGAAAAGACGAAGAACGAAAAGAAATACTGACTTAAAATCAGGAGACAAAAATATCGAAACTACCGAAGGAATATTCTTAAATGAAAGTGAAAAATGAATGATCAAACAGATGAATCAGAAAGCAACTCAATGATACTAATGTGTTGGAAGACGGGAaagaagaagaagaagaagaagCGGAAAATCTAAGTCGAAGATGAATTAAAGGTGAACATTANAACTGAAAAGAGCACTGAAGAGGCTTCAACCANAACTGAGAAAGGTGAAGATGTCGCTGAGATTTCAGAGN	GAATGATCAAACAGATGAATCAGAA	CTCTGAAATCTCAGCGACATC	193	passed	5	no
AV0027	tg	8	AATTAAACTTGAGAAAATGGTTTCCATTTCATGAGGTCACAAGGTAAGATTtgtgtgtgtgtgtgtgAGAGTATGTTCATGAGCAGGTGACGTACGTCATCAAACGAGAGTGTCTGCATCCTGATTGGCCACTGAAATCTCCGGATGTAGTCGATGAGGATAGGATGTTGCCAGATTTCATCGGATGTTTCCTGATCTTTGTGTAAATAATCATCATTGTACGAGAAGTTTGCGTGCTTGCGTGCAATCTTCAGTCTTTCATTTTTATGTTTAAT	ATGGTTTCCATTTCATGAGGTC	GAAAGACTGAAGATTGCACGC	244	failed
AV0028	ct	7	ctctctctTGATCCTCTACCCTTCAGAATTTCGGTAAATCTTTTCGAAAGCCTTCACCAGATTCTGGCACAAAACTTTAATTTCTAATCTTTAGATATCTATActctctctctctctCACCTTCATATTAATTGCCATTCCAACTGTTTTATAACAGTAGTTGTAGACGGTCGCAATTCTTTCTTTAAATCTATTCACAGTGATGCTCGACACTCAGTCTACAGGATTCTGTCCTTCTTCAATTCGTTTTTCTACGCTTCATCTACGATCTCTCTGTTACTTCTTCAAATATCAGTTGACAATTCCT	TCCTCTACCCTTCAGAATTTCG	CTGAGTGTCGAGCATCACTGT	206	passed	3	no
AV0029	tg	5	GGTATAGGGCTCTTAAAGCTCTAAAGGGAAAGATAAGAAATGTTTAGAGAAATATGCTTATGACtgtgtgtgtgCTTGTATGAGTGTATGCATGTGCATTTGTGGGCATGATTTTGTGCGCGTGATTTTAtgtgtgtgtgAAAATAGGGTTGAgtgtgtgtgtGATGAAATTGTAGCGGCACATTACGAGAGTAGGAAAAGTGAATGGCAAAATGTTCGTTTATTTATTATTATTTTTTAGCTAGCTTTAAATATTTTGCCGTTAAAGATTTTACACTATCTGGCAACCTGGGCCTTCT	GGCTCTTAAAGCTCTAAAGGGAA	AAAATCATGCCCACAAATGC	108	failed
AV0030	tc	9	ATAATAATAAACATATGCATAGAAACATAATCTATTCTTCTCCTTTACATATGTCCATTTCCCTCGCCTCCGTTTCCTCTTTGCCAGAATTTGAAAGTATAAAAGACTTTTCCACCCctctctctctctctctctCAATCCATATTTTCCAACACCCTTATATGTGCCTCTTTCACTCTGTCTGTCTGTTTGTCTGTCTGTCAGTCTATATCTCACTCTCTcacacacacacaAACATACACTGCCTCCCTCTTCCCCAATTCTGTTACAC	CATATGTCCATTTCCCTCGC	GGCACATATAAGGGTGTTGGA	121	failed
AV0031	ac	9	ATTATTATATAAAAGATTGTTAAGCACATATACAAATAACTAATAAAACACATACTGACACACCACAAATCCTTATTGttattattattaTCATGTTATACGTATTAGTAGCAGTATTACCATTTCATTTCCCAAGCCCTTAAGATATCTTACTTAGAAGCATGAGGTAGGCTATAGAAGCTTGCAAAGGCAGACATTTAGTacacacacacacacacacATACGCGGCTATATTACGTTTTCGCGACATATCTTTTGCCACCCCACTCACGGCGACTAAAACGCATTTTCCAATCATAACACGACATTGTGCCAATTACCACGACATTACGAACTGAGGTTTACACACGATACTTATCGATATATTTTTTCGATTTAAATAGCATTGGTTAAG	CGTATTAGTAGCAGTATTACCATTTCA	CCTCAGTTCGTAATGTCGTGG	240	failed
AV0032	tc	7	GGCTTTCGCAAGATTATTATTCAAGTACAACATTATACTTTTACTAACCTAACCTATCCTACCTAACCTAACTTAATCTTTTCAACCTTCCTAACCAAACCACGtctctctctctctcTTTCTTTAGAAAATATTGCAAATGAAATGGATGGTCGTGGATATAAAACAATTGAAATACAATAATTTCTAAAATGAAATTACAAGCAAAAAAGTCTTTAGTTAATACTCAACCCCAGAAAAAGGTAAGATGAATATAATGCAATTTAAATGAGATTGTTCGCTCCATATGGAGGATAATATTCCATTTT	TTTCAACCTTCCTAACCAAACC	TTGTTTTATATCCACGACCATCC	90	passed	5	kit #2 (NED)
AV0033	ct	7	TACTCACCCCTTCAACAATCCTTTCCATTCATTCCTATCATCCATCGAACTGCACACCCTCTTCCCAATTCATCTCTCCTAATCCCTCAACAACTCTTTGACACTATTCATCCAACTTTCCGCTCGGTCTCCCctctctctctctctCACACTCCACTTCTGAAATACCTTTATAGTCATTCTCTCTTCATTCATCCTACAAACATGTTCAAACCTTCTCAGCATGCTCTGTTCAGCTCTCTCAACCATACTCCTCCACCCACACA	AATCCCTCAACAACTCTTTGACA	AAAGGTATTTCAGAAGTGGAGTGT	92	failed
AV0034	tc	8	ctctctctctctTTAATTCTGATTTCATTCTCTTTCTCACCTTCTTtctctctctctctctcTTCTTATATTCTCAATTTAGTCTTCTCTCAGTCTTCAGTCTTCCTtctctctctctctctctc	TCTGATTTCATTCTCTTTCTCACC	GAAGGAAGACTGAAGACTGAGAGA	92	failed
AV0035	ag	8	AATATCGCTACATACAGGGATAAAAGAGGAAGAGAGTTTGGCTGCTATAAAGGAGAGGAAGGTAGATGTCATGGGTTTGGCAGTGACAAGAATCGCGGGAagagagagagagagagGTGGAGATCTTGGAGGAAGTTACGTCCTAATGTATTCGAGGGGCNCTGAGACGAGGTTGTAGACAGTGGAGTCGCTTTAAATAAGTAGGAACTTTAAATTGTCTACTTTTTTATTAGGATGTTCGTTTGATCAGTGAGAGGCTGA	TTGGCTGCTATAAAGGAGAGGA	GCGACTCCACTGTCTACAACC	154	passed	4	no
AV0036	ca	7	ATTTTCCCAACACAATTACATAAAAACACTTAATTTCAGCATCACCAAACACAAAAAGAACATAAATTCACAGAATTAAACCACAAAGTATCTAGCTTCCACACCTTGTTACACAAAACACTTATGCTTCAACAATTCAACAATATAAAGCACTTAATcacacacacacacaAGTACGAACAACATTATCACATATCATTCCTTATCA	CATAAATTCACAGAATTAAACCACA	GGAATGATATGTGATAATGTTGTTCG	142	failed
AV0037	cat	5	CTTGGAGTCTCTATGGGAGGTTCAGTGTTAATAGTAGGAGAATCCGGAGGAGGAGGTGGAGATGCCTGAGGGAGGACAGGAGGGGGAGGAGTTCGAGGAGGGGTTTTAGAAATACGGTTTtcatcatcatcatcaTCGTCTTTAAGGATTTCTTCAAACATTTCATCTGTGTCAATATTGTTATTTGAGTTGTTAATATGTATCCTTTCTCCAGTCTTTTCAATGTCATCATTCTTCACATTATAAGCTCTCCCTCCTTTGTTATATCATCACCCATTTTCTCTTCCTTTATGGAAGTAGAGTTCTCTACTGCATCCTTCGGA	GAGATGCCTGAGGGAGGAC	CATTGAAAAGACTGGAGAAAGGA	167	passed	2	no
AV0038	aca	9	GCTGATCTCTGATCTATCTCGTATTTCTAATTCTGGCAGAGAAAACACGGTTGTTTTCAATGCCACCAAAGCTCAATTCCTCCAACTCTCTACTCGACACAATCTTCCCCACAACCTACAAATACAACTAGAATAACGACAAATTcaacaacaacaaGAACAACAAAAAACAATAACAATAACGACAAAGACAAAGACAGAATCAACTAAAACGACAACCATAACTacaacaacaacaacaacaacaacaacaATGAAAACTACAGCTACAACTACAACTGCAACAGCAAAACTACAAATACAATTACTTCAACAAGAACAACAAAATGAACGACAACGACAACAGACAAATACGAATATAACTCAAATTACAACAATT	ACGACAAAGACAAAGACAGAATC	GTTGTCGTTCATTTTGTTGTTC	157	failed
AV0039	ac	5	ATTAAAAAGCACTAAAACATTGAAACATTGAAGCAACAGGGGACAAGGAGGGTGCACAGCCCCAGTCAACCTGTCCTACAGTAGTTTTCCCATGTTTTACACGATTTCCATGTTTAATACCCTTGTATTGTCGCTTTACACCTATTTATACGAATATTTAAATTTacacacacacAACTATACACATACGACATACGCACACCGCACATACGCACA	GAAACATTGAAGCAACAGGG	GTATGTGCGGTGTGCGTATG	190	failed
AV0040	tgt	11	CATCCAAGAATGCCCTTCATTCACTCCTCACCCACTCATCACTTGAGAGTTGGCGGCCTCCGATGATGGGAATGGTGCCGCCtgttgttgttgttgttgttgttgttgttgttgtAGATACACAAGCGATTAAACTTTAAGAATAACATAATTCGAGGTTGTTAATACATTCGGTTTAGAAATAACTGAAATagaagaagaagaAAAGAAGAAAGAAAAAAGATAGAAAAGAGCAACAGCAGTTGATAGATTCAAGAAGGATGGCCTTGGAGCAACTGACCTCTGATCTTTCCCGTATTTCAAGATTCNG	CATCCAAGAATGCCCTTCA	TTTCAGTTATTTCTAAACCGAATGT	191	failed
AV0041	gga	5	AGAAAGGTGATAAGAAGTTTTGCTGAAAAGGTAAAAAGAGGAGGGATATAGCGTGAATGTGGAAAAGACAGAACTGTTAACAGCTAGAAGggaggaggaggaggaGGGAGAGGAGCTTGTGCTGAAGGTGCATGGCTAAGAGGTGAGGGTGGTAGAGAGATGTGAGTAGTTTggggggggTATTCACAAGGGAATGAGGTAATACGCTGGAAATCACCAACAGGATGGAAGAAAAACGGAAGAATGGTGAGCGCTGTTCCCAGTCTTGACCGACAAAAGAATGGATATAGGAGCAAAGAAAGTAATTTTTAAAATTACTCTTACCCAATTTTGTTATATGGGGAGGAGGAAAGACTTGAAGTACGACAACAAGATAAGAAAGCAGAATTCAGTTTG	GCGTGAATGTGGAAAAGACA	CCTCTTAGCCATGCACCTTC	93	passed	1
AV0042	aag	5	AGATGTATCTGAAGAATAAGAAGAATGAAATTGGCGGTGGTGAACACTGAAATCAGAGAaagaagaagaagaagAGAGAATTTTCTCTATTTTGGAACTTTGATATTCAGGAGATAAATAACCGAACAATTGTATTAATCGTAGACCGATATGAGAGCATTCACCACAAAGTTAGAACATTAGGTAAAAAATCCAAGTTAGAGAAACGATAAACAAACATCGTTGCGCATGCACATATTTAGTTGACAATTGAAGAAAGAACAGTAAGAGGAAATAGAGAAGGGTTTATGATGGAACTTTTAAGCACCTGTGTTTCGGTTAGGAACAAAAAGGCTANGTTTTGAAGAAAAGAAAGCGTTCAGCAAAAAAAGTAAAATAGATTAAAGACAGCGAAATGTT	GAAGAATGAAATTGGCGGTG	TGCTCTCATATCGGTCTACGA	140	passed	2	no
AV0043	ttg	5	GATGAGTTTACCCGTACTTTTTCGGACGCGTACGTTTCGAAACCTCGTTCGCAAGTTTTTACGTTTATTAACGGTAAAGCCACCGTCTCCGCCACTTTTAAAAAGTTTGCTATTTCCCCGCTCAAAGAAGAAGTTGAATCGAGGAAGGCGCTTTTATCTACGTCATTATTTACGAAAGAAAATACCGCCGGAGAAATAATGTTGTTTTCCCTTCAATATTTGAttgttgttgttgttgTCGACGTTGTTGATGATTATCGCGAAGTTCTTTAAAAGCTAATTTTAAAACCGCTTTATATAAAAATTCAACCACGCATTGATTCAACGAATTTACGCCTTCTTCGAAGAAACGTAGTTTACAAATTCGGCCTTAGCTTCTTCGTTAAATAATTTTTCCTT…	GAATCGAGGAAGGCGCTTTTA	GCTTTTAAAGAACTTCGCGATAA	142	failed
AV0044	cct	5	AGGCATCCGCCATCTTGTACTTAGTGTCCTCCATCTTGGATTTGGAATCAAGCTTCTTGGCATTCGCCAGCTTGACCATGTGGTATCCGTCATTTTGACCACGTGGTTTCCGACATCTTGAATTTGATTCTGAATTCTCCCACCATGTTTTCTTGACCGCAGCGCCATCTATTGAGTGAAAATCAAAcctcctcctcctcctCCAATATTCATGGTAAAGAACTTAAAACTGTTATGAGACCAGGATTCGAAACCTCAACCTTCTGATTTG	TTCTCCCACCATGTTTTCTTG	GGTTTCGAATCCTGGTCTCA	121	failed
AV0045	tg	9	GATTAGGAATTCTACTATATGAAAGCAAAGCATTGTGACGTTTAAAAATATATAAAGCAATAATTTATACGGTATAATCGAAAACGTAGCTATGAATATAAGAGGAAAAGTAATAATCCATACGATATAATCGGAAAAGTAATATCGGATTCCGTGTTACAATGTGTATGAGCGAAGAAGTAGAAAAATTTCAAAGTCTGAGATCAGAATAACGGTTAGAGTTGGTTACCACGACAACGTCATGAATGTGGGAAGCACAGTTACATCATCTTTGTAGTTGTGATTGTTTGTATGTACTTGTGTAtgtgtgtgtgtgtgtgtgTCTGTGAGGAGTAGATTGTATTTGGTAACAGCGATGATT	AGTTGGTTACCACGACAACG	TCATCGCTGTTACCAAATACAA	140	failed
AV0046	gaa	5	GGGGTACCAGGAGCAGAGGATGCAGATTCGGCGGATGAAGAAGCGGATACGGAAGATGTAAGTTCTGTGGATGGCAGAACATATGAAGAAGCATAATCGGAAGATGTAGACTCTGAGGATGTAGGAGTTGATGTGGCAGGAACAAATGCTGAAGACGAAGTGGATTTAGGACAAAAGCTGTTTCAAACGTTCAAGAGAGACCATGTCCGACTTGCCATTTGGAAGTTGTAATTTGAAGCACCGGTCgaagaagaagaagaaGGGACCTGAATATGATGCCTATAAAGCTCGCCTGATCCGATCTACTCGGACATACATATGAGTACA	CATGTCCGACTTGCCATTT	TCCGAGTAGATCGGATCAGG	110	failed
AV0047	gt	5	GAATTTGTGGGGAAATGCGCAATCAAAGGATTGGGGACAAAAAAGCAAAAAGTAAAATAATATGAATTGGGCCTGAGAAGGTGGTTGTGAGGAGGGAGGAATGGAAGGGAGTAGAGGTGAGGGGGAAAGATTGGAGGAGGTAGAAGAATTCAAATATTTGAGAATGTTGGTGGATAGAGAAGGGGGTATAGGATAGGAAATAAAGAATAGAGTGGTGGAAAGAATGAAAGTGATGAGAGGATTAAGGGAAGTGTGGAAAAAAGGGAAAACATCAAAGGAAATTAAGGTACGAATGTTTGAgtgtgtgtgtTTGTCATCTGTAATTTATGGATGTGAAACATGGATGATGAATGCTAGGCCTT	GGAAAACATCAAAGGAAATTAAGG	GGCCTAGCATTCATCATCCA	97	failed
AV0048	ttg	13	ATGTGAATGGGGCTTAAGGGGTGGGTTATTAATTCTCTTTTTTGACCTTTACAGAAAAAATGGGTTTAGTCTATTTTGAATTTCTTTGTTTCTTCTTTTGACTTTCTTATATTTCTTCTTTTATTTTATACATACTTACTttgttgttgttgttgttgttgttgttgttgttgttgttgACGATGATATTGAGGTTGATGTTAATATTGATGTTGATG	TTTGAATTTCTTTGTTTCTTCTTTTG	TTAACATCAACCTCAATATCATCG	130	failed
AV0049	aca	7	TTGCCCTATTTCACGATCATACCCCATGCCCTATTTCACAATTCTTCTCTTAAAACTTTCAGCCCAATTATGCATTCGACTTTCCCTTTTAAGGAGCTACGCCACAACAACGACGacaacaacaacaacaacaacaAAACATTAAAACATCAAAATATAAGTTTTCAAAAGACTTTGCCTAATAAAGGGAATTAAAAATATCCACTCTTCAAACACTCGAAACATTTTGACATAACGCACAAACGTACGTACAAATATTT	TACCCCATGCCCTATTTCAC	CCTTTATTAGGCAAAGTCTTTTGA	169	failed
AV0050	ta	5	CTTTCCCACAATTGCGGGGTGGTGTCTACCATAAGCCATAATCTTTTCTAATACTCATAAACTTGCCACTCTTTTCCACTCACTTCTATCCTGTGTCAACCGCACACCCTCATCCCAGCTCAACCCTCTGTCCCTCAATAGCTCCTTGACCGCTCTCATCCAAACTCCTTTCGGTTATCTCCTTTCCCTTtatatatataGGCACTATACACGCATCTTGCCACTCCTGAGGCACTCCCCTTTCTCCTCAGCACACATTAAATATTCTTACCAACCATTCAACCATCTCCCCGGTTCCCTTCCATATCATCTCTCCatatatatAGCATCCATTCGTGCCGTACTTTTAATTTCTTACCTTTCCCACCGCTACTTCCACTTCCTCCTACTATTCCATTC…	ATTGCGGGGTGGTGTCTAC	TGAGGAGAAAGGGGAGTGC	240	failed
AV0051	ga	7	TGTGAATATTAGTTGAGAATGAGGAATTATTAGTCGATGACGGTGAATTATTAGTTGATTGAagagagagATAGAGAAAGAAGATAGAGTGAGTGAAGAGAAagagagagagagagagagACGTAACAATTATTTGTGAAACTAGGAAAGAGTTAGTGAGCGAAACTGCTGATAAGAACGAAAACCTTAGTCTCCTACCTTTTCAAGGAGATCGGTAGAAAGTAAATACATGTATTTTACCTAGT	GAGAAAGAAGATAGAGTGAGTGAAGAG	CGTTCTTATCAGCAGTTTCGC	107	failed
AV0052	tc	6	TGTTGTAAATTAAttttttttGCCCCAGTCTGTCTACTCTAAGTTGTTCACCTATTCGCTCCCATGACTCTCCCTTTGCAATCCTCTCCAGTCTCTCAGCGCTGTTTCTTCGTTGAACATTTTCCGCTCTTGTCTCCGGATTtctctctctctcATCCATTTTCTAAACGTTCTGTTTCTTTCTTACAGCCTCACCAACCTCCTCCGTCTACCAAGGGGTCTTTTTACCTTTACCACTCATTCGTTTCGCACCTTGTACCTCTCTAACATATGTATTCTAGTTTTTCTTTAAAGTTTGTCCACTCATCTTCAACATCCT	CGTTGAACATTTTCCGCTCT	GGAGGTTGGTGAGGCTGTAA	93	passed	2	no
AV0053	atac	5	CGTCACTTTGAAATGTTTTAATCATGAAGATAAGAGACCGAGTCTTTCATTAAATTTGTTATCTCTACACTATAGGTGTTTCGGATGTAAAATTAAAGGcgcatccgcatccgcatccgcatcCGCACTTCTTCAAAATTCGACATCCGCATCGACATCCGCATCCGCAAAATTGGAAAATATGACATCCGATCCATCACTAatacatacatacatacatacAGGTATTCCTCGCATAGTATGGCTAATTGCTT	CTTCAAAATTCGACATCCGC	CAATTAGCCATACTATGCGAGG	121	failed
AV0054	tgt	7	AAATTCCTGAAGGCGCACGAGTCCAAAAGTGATTCAATAGTTGTGCTGGCATTTTCCTCTCCATCCAAATGAGGATGGTGATGCTGATAATTATGATGGTGATAGAGCTGATGACTCTGGAGGGAGGAATGTTGGAAAGGTGATTGATgagagagaAGATCGGGTTGATGTGACTGTTGTTGATGCTGCTGATTCtgttgttgttgttgttgttgtTGCTGTTGGTTATAATGGTGGTACTGACTATAACTGCTAAGGTTATGTGAATGATATACGGCAGCTTTTGAGGAGCTTCCTACAAATGCATTCATGGCACTGGCACTAT	GATCGGGTTGATGTGACTGTT	AGGAAGCTCCTCAAAAGCTG	140	passed	2	no
AV0055	ag	11	GACATTTTGCCAATTGTCCCAACAATTCGTTAGGACAATTTTCGCAGAGTATACATAGAGGATAAACATTATTGAGAAACCTTCAACCATCGTTGAGAATCATAAAGTCATGATTTTAAGTTTCGAATTTAAATTTAATTTTAAATCATATTGAAATCCTGATagagagagagagagagagagagCAGAAATGACGTACTTTAAAATTACTAATTTAGGCTTAAATGAGTTGGAGGGAG	CCCAACAATTCGTTAGGACAA	CCCTCCAACTCATTTAAGCC	220	failed
AV0056	gtt	8	TTCCTGAGGTTTCAAAGGAGCGTTTGACCTTAGAAAGAGGGTGGGTCTTCCACTCGCTTCACCTTGAGCTTTGGAAGTTTCCTTCGCCATGTTAAAATAATGGGAGGGGTTGGGAGGTCTTTTCCAAGATGGGGAATGATTGCGAGTTAATTGTTGAGGTATTTAgttgttgttgttgttgttgttgttTTAGGTGCTGCTGTTGTTGCTGTGGTTGGAAATGAGTTGTTGATGTGATATTTTGAGTCATTTTTGCCGAGG	TTCAAAGGAGCGTTTGACCT	AACCACAGCAACAACAGCAG	206	passed	5	kit #1 (6_FAM)
AV0057	ag	6	ACTGGGGTGGCATATAAAAATCATAAAGACGCCTCAGAAGACCATACCTCTTTGAAGCTTGTTgagagagagagagaAGTAATGTGATCCTTCCAAGAAAGATCACGAGAAAAAGAAACACCGAAAATATTCTGGACATATGAAGATTTAAGTCGAGTGTTTTTGAAGAAGTTATCATGTTTTGTGTGCAACGTTGTGTAGAGTAGATAGATGAAGGAATTGAGTTTTGTGACATTGAAAACGACCATGTTTTTGCTTCGATTAACTGTTGTTGGGAGGGGTATTCTTTCAAAGCGAAAGGATTATTGAAAAGGTTAATAGAAAGGATAAGTCATCAGCCTATGGGTGGATAGGTGATGAAGTAATATAGCGAATGT	AAAGACGCCTCAGAAGACCA	CGGTGTTTCTTTTTCTCGTG	99	passed	1
AV0058	tatg	5	CAAATGGAAGTACACATACACAAACACTCATacacacacAGCACTCAAGGACGAACGCATACACATGTAGCTTCATCTTCCACACCATTTCACCACTTTCTCTTCTTAACATTCAAGCCTAAAGGTTGAATTTTCTACCCATAAATAAGAAGACAAAATAAGAAGACTATATACATTTACACTTACAGAACAAACAATAATCTATGTATATATGAATGTATGTAAGTAAGTATGTAAGTATGTATGAATGTCGgtatgtatgtatgtatgtatGTAAgtatgtatgtatgtatgtatGCATGTACAGTCGTCAACAGGAATTAGTTCCTATGAGACTGGAAATAATATTtatgtatgtatgtatgtatgTATTACGCATTTGTGTAGGATATAGTATGt…	CATGTACAGTCGTCAACAGGA	ATACATACTATATCCTACACAAATGCG	103	failed
AV0059	gatgag	8	GATTGTGATGATGAAGAGGAAGACACAGATTTCGATTCCGAGTCAGACTCCGAGTCAGAGTCAGACTCCGAGTCCgatgaggatgaggatgaggatgaggatgaggatgaggatgaggatgagGATGAAGATGAACAGAATCAGATACAGATAAGAATAAA	ACAGATTTCGATTCCGAGTCA	TCTGTATCTGATTCTGTTCATCTTCA	127	failed
AV0060	ca	5	CGTACCACTGCCAGAGCCACTGTCACTTCTTCACTTTCTTGGGCCCAATGACCTTTTGACCAATGTTTTGTGACCCTTTAATTGTATACCACGTCATTTTAATCGTAATACCACAAACTACTTGTCGTTATCCCCAAGATAAGAGTATTTAAGCACGTGATCACAATTGGTAAAGTCGCTAGTACCTTGACACTGACACAATTCGCACAATCCTTcacacacacaTGAGTAGGACCCGATCCGACAGAGTCGAACTAGGAATCAAACTTCGGGTACGGTGGAACGGGATCCGGGTTCTCAATGTTCTTATTCATGCTACTCTTTAGTCTGCCCTCATGAATTTTTTTAACAAGCCATCATCAATTTTGGTATATAACGTCGTCGTCGCGTGACTTGTAA…	TGATCACAATTGGTAAAGTCGC	AAGAACATTGAGAACCCGGA	151	failed
AV0061	ct	5	TCAAATATGCACATTTCATAAATTTTACTTTTTAGTTTGTATGCATTTACCCCTCTTCCATTTtctctctctcTTGCTCTCACACGGTTAATTTGGCACTCCCAGCTCTCACTACGCACCCTCCTCTCCCTATCCCTCCCCTTCTCACTCTTCTTCGGTCCCTTCGTTCCATACTATTTCAGCATGTCTTTCActctctctctctctctCCACTCCCTCCTCACATCGATTGGTGAAGGGACTGCAAATTTGCATTGAGAATCAAGCGCTACAAAATCTTCAG	GTTTGTATGCATTTACCCCTCTTC	GTATGGAACGAAGGGACCG	140	passed	3	kit #3 (HEX)
AV0062	ct	8	TCAAATATGCACATTTCATAAATTTTACTTTTTAGTTTGTATGCATTTACCCCTCTTCCATTTtctctctctcTTGCTCTCACACGGTTAATTTGGCACTCCCAGCTCTCACTACGCACCCTCCTCTCCCTATCCCTCCCCTTCTCACTCTTCTTCGGTCCCTTCGTTCCATACTATTTCAGCATGTCTTTCActctctctctctctctCCACTCCCTCCTCACATCGATTGGTGAAGGGACTGCAAATTTGCATTGAGAATCAAGCGCTACAAAATCTTCAG	ACCCTCCTCTCCCTATCCCT	CGCTTGATTCTCAATGCAAA	151	failed
AV0063	taca	7	TACGAGAATACACAAAACATCTGTACGGATTCCCTCGTAAGGGACCGTGTGCacatacatacatacatacatacatacatacatTCATACATACACAAACAAAACTTTACCTTTATAAAATTTATAATATCTAGCGAGCATTTATGTTTGGCCTTTAAAATTTCACACAACGCTATGCACATacacacacacacATACATACATAATGCATACATACATACACACATACACAAATACAACCTCGTTCAAATACATATTCAAT	CAAAACATCTGTACGGATTCCC	GCCAAACATAAATGCTCGCT	140	passed	6	kit #3 (NED)
AV0064	tg	5	AGAATAAGGGAGATGTGTGTATTGGAAGgtgtgtgtgtgtgtgtgtGAATAGTGAGCAGTACAGAGTAGGGAGTATTAAGATAATTTGGACATGTGTGTAGGATGAATTAAGATAGGATGATGGGTAGAGTGGTGAGATCAAGGTAGGGAGGAAGGAGGAAGGGAGGTGTAAAAATATGGTGAAGGAGATTTTGCAATAGGATGGTCTGAGTGTGGAAGAGGTAGGAGAATTGCGGAGGACAGAGCAAGCTGGATGGCGGAAGCGAAAGGAAGTGGAAGGTAGGAGgtgtgtgtgtGGTGAAGAATTGTAACTAGCACCACTACACGAGACTGGGAAGAGTAATAAGTGGCTCAAACGGTAGAGTGATTGACTCACGTG	AGGAGATTTTGCAATAGGATGG	CGTGAGTCAATCACTCTACCGT	194	failed
AV0065	tg	5	TTACGAAGGCGTCTCAGAACACCCAACCTCTTAGGAAGCTTGTTTAGAAAGAGAAGTAATGTGATCTTTCCAAGTAAGATCACTATAAAAAGAAACACCGAAAATATTAAGGACAGACGAAGGTTTGAAGTtgtgtgtgtgTTTTCGAAGAAGATGCTGTAGTTTTGTGGAAGGTTGTGGTGATTAGACATTTGGAGGAATCGAGTTTTTGAGGCATTGAAAGCAACCATGTTTTCTCTTTCCCAATTTTGAAATATGAGAAAGAACAGAGATTAATTGCTCCAAGACTATTTTTCTGAGTCAATTAACTGCTGTTGAGAGGAGAGTCTCTCAAAATTTGAAAAGTAGTAAATGAAAGTTGTGGAGTCATTGGCATAGGAGTGAATATGTAATGAAATA…	AAGGACAGACGAAGGTTTGAA	TCCTCCAAATGTCTAATCACCA	91	failed
AV0066	ca	9	AAGCGCCGAAAAGACACACCCACGAACTAAAACTCAAAATTAACATTAATTAATTATGCGTTTTAACCCTTTAGCCAATGACTTTATTAAAGCTAAGCCGAATAATTATTCTAATGAACGTCTAACTTTTAATTTAATATACAATCCTACTTcacacacacacacacacaATACGGAAGTACATACATAAACTATTTTGCAATAAAAATACATACATACCATACTTCACACAAATATATACACACAATATGTATGGACATGCATAAACATTTTGCAATAAAAAATACATACATACCATACTTCAC	GCGTTTTAACCCTTTAGCCA	GCAAAATAGTTTATGTATGTACTTCCG	143	passed	2	no
AV0067	caa	6	CAATATAAAGAACTATAACAAGCAGAACTTGAGCAAGAACGATATCTAAAACAAaacaacaacaacaacaacAAGAACAAGAATAAGAGCAGGAACAAGTACAAGACCAAGAACAAAATAAagagagagTACAAGAACAAGAATAAGAATAAGAACAGGGGAAATTACAAGACCAAGAACAATATCAAGAGCGATTACAAGAAAATGAACGAGAATAAGAACAGGAGCAAGTACACTTTGTTTGGTATTGTTTATTTGATGAATTTTGCTATATGAATACAGATTGTCGTCTGTTAAAACTGAGTCTGAGTCAGAGTTtgagtctgagtctgagtctgagtctgagtctgagtcTGAGTTTGAGTCTG	AAGAACTATAACAAGCAGAACTTGAGC	TTGGTCTTGTACTTGTTCCTGC	103	failed
AV0068	tcc	7	CATGAGTTTTGTTCCAATTTTTTAATACGAAATGAAAAGTGAAATAAGATTGCTGAAAATGAGTCAGCTTACATGTGCTGGTTAATATTTTGGGAAATTTTTATTTCAGTTGTTTATAGGGGCTTAAATCCATAAACAAACTTCCAGCTTCAGGCATCCTACCGAAGTACCAGTGCCAATCTTTTATAATGTATTCCACTGGCTCGATACAGCTTTGCCAAAATATATGTAACAGTTCTATGTTCAATCTTTCATGTACTCTATTGGTATAGTCTGGAACATACTCCCTTTATCTATTTTTTCAACTTCCCTTGACTTGCACGCCTTAAAACCCGTGTATGAGGACATGTCGACCTTTAACCATtcctcctcctcctcctcctccTGTTCATTGATCAA…	CTTGACTTGCACGCCTTAAA	GGTGCTACAGCCATACCCTG	111	failed
AV0069	at	5	AGGCCTCTTGTCATCCTCCTCTTCAGACAATCCCCTGAATGGTAATCTTACACAAACCCTGAAGACGCatatatatatTTTATACCTACAACCTTTCCCACAATCGTGGAGTGATGTTTATCGCAGGCCACATCCATCCAAACACTCACCCCTTCAACAAACTTTTCCATTCATTCCTATCCTTTGTCAACCGCACACCCTCCTCTCAATTTANCCCTCTATCCCTTAACAGCTCCTTAGCATTACTCATACAACTTCCTCTTGGTCTGACCCTATCTCTCACACCCTCCACTTCTGAAG	AGGCCTCTTGTCATCCTCCT	ACTCCACGATTGTGGGAAAG	112	failed
AV0070	ct	7	CTAGCAGTGATCGTTGACGCTTCTAATCTCTCCGGCATAGCTCGTGCCCAAGAATTGGATTCTGAAACCATTTCTTATACAGACCGTCTTAAATCTTTTActctctctctctctTCAAACTTCAATTCTTTATGATATTCTTCTGTTTACCCTAGTCCTTTTGTGCCTAAAGCTCTTAAGCGTGTTATCTTTACTGATCACCACAACCTATCTCATCCCGGTATCAAGGCTTCGGTTAGTTTATCAAGACACGCTACTTTGACCAGACATTAAGGACGTTCGCACTTGCTCTCGAGAGTGCCTACTTTTGTCA	CATAGCTCGTGCCCAAGAAT	CGGGATGAGATAGGTTGTGG	185	failed
AV0071	tg	9	AACCGGATAAACGACTCGAGAAACCAGAGAATGGTATTTTGTGATTTGCATTAGTGAAAATGAGTGGTTTTGTGGTCTGTGTGTCTGAGAATGGTGTTTTGTGGAATGTTTAATGAAGTTAAATTTTTGGTGTATGTGCGTAAGTGAAATGTGAGTGGCGTATGATtgtgtgtgtgtgtgtgtgCTTGTGTATGTATGTTTGTTTGTGTGACTAAGGTTGATGTAATGTGACTTGTGTTGATGAAATTGAGTG	GCGTAAGTGAAATGTGAGTGG	CTCAATTTCATCAACACAAGTCA	114	failed
AV0072	gata	19	AACAGCATAAAGTTAGGCAGGTTGAAAGATTCAGAGAAAGAGAACATGGGCACAGATTACAGATATGgatagatagatagatagatagatagatagatagatagatagatagatagatagatagatagatagatagatagataGTTTGAGGTGAGTACAAATGAGTGCCTATTTAGGGGATTTAAATGCGCGGGTTGGTAT	ACAGCATAAAGTTAGGCAGGTTG	GCGCATTTAAATCCCCTAAA	190	failed
AV0073	ac	6	CTGTTCCACCCAAAATTTTGCGACCCCTCGACTTCCGGCTTTGACCCAGCAGTCCTGGTTCACATATTAAATTTCCTTAACCAATATGCCTAGTGTTCTCTAAAAGGCAAATTAAAATATTTGCGAATGAGGATATTAATTCTATTAAAACTCATAAAACTATTTTTTTAACTTTTAAAAATAAATCTATAAAGAACATGATTAACATTCCATTATAAGAGTATTTCATTGTAGTTATGATGTTAAAAACATTATTTTGGGGCTGACTGACAAACTATCAAGAAAATCTGATAATTGGAAAAGGTAGTTGTTGAAAAGACTTCAGGGCATATTAAATATTAACATGCTGAATCACGAACTAAAATACTTAACACAAATACAACATacacacacacacCC…	ATTTTGGGGCTGACTGACAA	ATTCGTATCGTAATTCAACGTAAA	185	passed	2	no
AV0074	tg	5	acacacacacacacacacacacacacacATACACTATTTACAGTCATTGAAGGTAGTTGTAGCATTTCCTTTGTATTTTGTTAAAGTTTGTTTTACCAGTAATGGTCACTAGCATCAGCAACAAGTTCATCAAATATTGAGGATACACAAACTACCTAGCAAGTACAtgtgtgtgtgGGAAGGATGCTCAATGTGACTACATTGCTCTGGTGCTTAACCTCCAAGACACATGCGAGATACCAGTGGGCATCATAGACTGCCAAGCAG	TGGTCACTAGCATCAGCAACA	GGCAGTCTATGATGCCCACT	159	failed
AV0075	cactca	7	TCTTGGTGGCACCAAACCCATCATCAGAGGCCACCAACCCAAAAGTGGTAATTGGGAGGGGGTGGATGAGGGGCTATTTTTGGAAGTCTCCCCAGGGGCTTCTCCGCGGCTATCGAAGTTAACGCCATTATTGATTTTTTCTTTAAAAGAAAGGGTGTGTTAGTATTAATATTTTATGAGTGTAAAGGAGAGCCTACTCCGTGTACATGcactcacactcacactcacactcacactcacactcacactcaCATACATATTCTCAGATACATATACAATCAAATACACAGACACCCACACTCGAATACATACATATGGGGTGATAGGGTGGGTAAACCATTCCGTTTCACTCCGTTGCCCTTTGGTTCGCTCCTTTTCGTGTTTCATCTTTTCAAAGGG…	ATTTTATGAGTGTAAAGGAGAGCC	TCGAGTGTGGGTGTCTGTGT	134	failed
AV0076	ga	6	TATACCTAATCTTATATGTACTCTACTGGTAAAGTCTGAAGCACACTTTCTTTATCTGTTTTCCCAACTTCTTTGAGCTTGCACATTTTCAAGTACGACAACAAGAGAAGAAAGCAGAATTCAAGCAGCAGATATAAGGGTGCTGCGGTTGTTGGTGGGAAGGACAAGgagagagagagaGGATAAGAAGCGTAATAATAGAGAAAGTAGTAGGGGTTGGACCAATTATTACAAAAGATAGATGCAG	GCAGATATAAGGGTGCTGCG	TTGTAATAATTGGTCCAACCCC	107	failed
AV0077	at	7	ACTTTTACTAGACGTACTTAATTACGACTTATCATAACCTGAATGACCGAAGTTTAGCCGTAGAGATTCAGGCCTAACTGATTGATGGAACGTTGCCATGGCATACAGGCCTACTGCCGTATTACACAatatatatatatatTGAAGAGAAGTTTCATTGTTTCATCACCCAGGAATTGAAATAATATAATAAACAGAATCTAAGTTAAAGGATTGGAAAGACAAAACTAAGTAAGTTGaaaaaaaa	GAATGACCGAAGTTTAGCCG	CCTGGGTGATGAAACAATGA	134	passed	3	no
AV0078	gt	7	TTTGTACCCAAATACCTATAGAGTGTCTGTACTTAGCgtgtgtgtgtgtgtGCGTGTTTGAATGTATGATTGTGCGTATTTTGTAGACGCTATAGAGTGTCTGTACTTAGCgtgtgtgtgtgtgtgtgtgtgtgtgtgtgtgtgtgtgtG	CCCAAATACCTATAGAGTGTCTGTACT	TCTATAGCGTCTACAAAATACGCA	90	failed
AV0079	ct	6	CCACCAGCATTCCCAGATATTTGATTTCTTCCACTTTCTCctctctctctctCCCTCCTATCAACCGATCCATCTCTACCCTATACAAAATTCTTCCACCTCTTCCCCAAGCTCTCACTCTCTAACCAACACCAGAACATACCCCTTTAAAGCCAGCAAAAATGACCTTCCCCTTCCCCTGAAGTTTAGTCTCTTTCAACCCCAACAAATCCAACTTCTTTGATTGCTTACTCCCCATTTTCCATCTACTTTATATCATAACTTGATCCTCTCACATTCAAACATCCAATTTTACATACCACTGAACCTCTTTTAACTTGCATTCTATCAGCCTCGATAGTATAGGGTTCACCCCCACTTGAGGGTTGAACC	CCACCAGCATTCCCAGATA	TGGGGAAGAGGTGGAAGAAT	109	failed
AV0080	tc	10	TTTCTTTGTTTCTTTTCATTGCATATTTTGATAAAGGTTATTTATAGTTTCTAATCTTCCTGACTCTGtctctctctctctctctctcTTCTTTAATCCTGAAAGAATTGTTTTGTTATCCTATTGATAATCTAGACTCTTCTCTTCATGAGAAGACGACTCAAATTCTTATATTACTTAAAAATAATTGAAAAGTGCTTATCTGCTTGCAATCGGAAGTAGGAGCGATTCTGCT	TTTCTTTGTTTCTTTTCATTGCAT	GGATAACAAAACAATTCTTTCAGGA	121	failed
AV0081	tat	7	TCCTTTGGTAAAATCGATGGCAAACCTAGGTTTCCTTCGTCTTTAAAAAAGGAATCAGAATATAACCCTTTAATATTGGTAGTGTTGGtattattattattattattatTTGATTACTTGATTTTGATTATTCCTGGGAAAGTGATAGGAGAAGCAGAATACCTCCTGAAAGATTAAATATAAAGGGAGAAGTAGGATTCCTCCTGAGAGAAAGTAAATAAATAAGTAGGAGAAGTTGAATACCTCCTGAGAAAAGAAATATTCAAACAAGGAAATCAGTAGATTTCCTAAAGGAACA	AACCCTTTAATATTGGTAGTGTTGG	TCAGGAGGTATTCTGCTTCTCC	106	failed
AV0082	ag	6	GAGTTGGAAATAGGTAAGCGAATGTGCTCCTGAATTTACCAATAGGTACATGTCTGATTGAGCATAGCAGTTATGTCTGGGATTAGAGTAATTGGACAGAGTAGAAGGGCCTGTCGCACGAGCCCTTTTCAGGCACAAGACAGAAGAGTTCAGAAGAGCAGTGTCCATTGTAATATCGATTAGAGTagagagagagagagagAATGAAATAATTCGACGGGTAGAAAGAGACTGGAGAGAATCAGTGAGAGCGGAAGAGTTGATAAGACGAAAAAGCAATAGACTACAAACTTTTCAAAGAGGGCAGTTATAGTGGAACCACCTAAGATGTGTT	TAAGCGAATGTGCTCCTGAA	CCAGTCTCTTTCTACCCGTCG	221	failed
AV0083	caa	5	ATGCCAATAATTTATCGTAAACTTAGCAAATTAATGCCAAAACTATAATAAAGTCCATATTAAGTCTAAAAATGTTGCATTCGAAATTAAGATGATAACGGTAGCTATATATTTAAATGCGAACACATTTACTAAGTACAAAAGTAACTGTGAATAAAATTAAATTGATCGTTTTGAAGAAATCAGAGCATCAACTTTTATGAGCAAATATAGCTGCAAAAACAACAGCCACAATAACAACACAAATACCACATGCTACAATTTCAACAATACTAAATTcaacaacaacaacaaCACCAACAGTAACACCACCACCATCAATATAACTATCTCCAGCACCACCACCTG	AACAGCCACAATAACAACACAAA	GCTGGAGATAGTTATATTGATGGTG	114	failed
AV0084	ac	16	GTAACGATATAGTACGTGATTAAATGCTGAAAATATCTTGTTTCTCTGTCCTTATCATGCATAAATGATTTACATACTTacacacacacacacacacacacacacacacacCAATACAGAGGTAGAATGAATGATGAAGAACTTAGAGAAACGAGTAACAGAACCCT	TGCTGAAAATATCTTGTTTCTCTG	AGGGTTCTGTTACTCGTTTCTCT	143	failed
AV0085	gta	5	GTAGTAGTATTTCATGCCGTAAGTCCTCTAGACAATATACTTTGTTATTTTCAAAGAGTTACTCACTATGGTAGCAGTACTACATCCCCTATACTCACTAGACAACTTAATTTATCATCACGATGTCAGTTgtagtagtagtagtaACATTATTTACTTAAAACTTCAATGTAATTACCATAACACAAAGTCATTTTTCTTGTAATCACTATCATTCACATGCACGCACACGCACACACGCACGCACACACGCACTTCAGCTTTACAAACACAAACATACTAACAAACAAACCAACATATACCCCAAGACGATCATTTAAGCTTTCTCTCGCTCAGCCTTTTGGTTTTAGCGTTCTTTATCATTTTTAGTTTGTCTTATTTTAATATTATTCACATaca…	CATGCCGTAAGTCCTCTAGACA	TGTGTTATGGTAATTACATTGAAGTTT	175	passed	4	kit #1 (NED)
AV0086	ttc	6	CCTTAGCCAATCTCAACTCACACTCGTAGAAGTTCTCAAGCCTTTGTTTAAGTAGTTCTTCGGTCTCTCGGGTGCCCCTTGGCTTCCGATACTTAAGTATTAGATGATTCCCTttcttcttcttcttcttcTTGTGTTCTCAATTTTGTTTATGCCATACTTAATATTCATTTTGGCTTTGTGGACATAATATAGAAAAATACCTAATCAGGAAATacacacacacATACATACATGCACATGCTTGCATAAAATTTATTGTTAATTTTAATATTTGGATAATAACACTAATGGATACAGGCACCGAATGTTTTGGGTCTGGATTCTCAACAGGAAATATCTGATGGATGA	CCCTTGGCTTCCGATACTT	TGTCCACAAAGCCAAAATGA	112	passed	4	kit #1 (HEX)
AV0087	att	5	ATTGGAGGGAAGGAAAGATAGGAGAGGGTTTGGGGGTGGTAGTAGGGGAATGAGGCTTGGGGTGGGGGGGAGACTCTGGAAAAGAACTGGattattattattattATCATTTTGGATCGTGAGTTGAGTGAAAGGCCAAAAGATTTTTAAACTCTTCCATAATTTTTAATTCACGAGACATTTTTTCTTTATATCTGTGGGCATTACAGCGGCAAGTACT	AGTAGGGGAATGAGGCTTGG	GCCTTTCACTCAACTCACGA	96	failed
AV0088	ttg	6	TTATTTGTTTCAAGCCGAGTGTATTTATTCTTTATTTGAAATATTAAGATATAAAGAGCACAAGCTCCTAATTACTACTTAGCGACCCTTCTGCTTGTTCTTGTTCTTCTTCCTCTCCTTGTTTTTGTTCTTCTTGTTCTTGTTGTATTTCTTGTCTTTGTTCTTGCTCTTGTTTTGTTTTGTTCTTCTTTTCTTGTTCTTGTTCTTCTCTTTGTTTTGTTCTTCTTGTAATTCTTGCTCTTGTTTTGTTTGTTTCTCTTTCTTGATCTTATTCTTCTTATTCTCCTTGTTTTGTTCTTCTTGTTCttgttgttgttgttgttgCTCTAGTCGTTGTTCTTGTTCTTTTATTCTCCTTATTTTGGTCTTCTTTCTCTTGTTGAAGTACTTGTTCTTGTT…	AATTCTTGCTCTTGTTTTGTTTG	GACCAAAATAAGGAGAATAAAAGAAC	138	failed
AV0089	cta	7	TTCTGCTACTACACTACTTTTGCTATTATTACTACTACTTCCACTATAATTGTTACTTCTACCACCACTATTGctactactactactactactaTTGCTACTATTACAACTAAACCATTTCCATTGATCATTATAGAGCCACGCCCCCTTTCCCAAAACATCTTCCCGAAACATCTTCCAATATTTCCGATGACGTTTCTCAGGGACTGAAAACGTCAGTCCGACTTTGACGTGTTTAATATTAAAATTATTTTTATACCTGTTTTGAGGACGACCTGTGGTTCGAAACCCTTTTTGGGCTACTGAGTCAGGTAGCACAAATCATACATGTCTtctctctcATGCTGATAAATCAAGATGTAGTGGATTCAGAAAGGTANACATACATACACATACACG…	TTGTTACTTCTACCACCACTATTGC	TGGCTCTATAATGATCAATGGAA	92	passed	3	kit #3 (HEX)
AV0090	at	5	GTTGACCCATGCAATAAAAacacacacacacacAATGTTCCTATGTAACTATATTGTCATGGATACTGTAAGGTCTTTGatatatatatCATAGGTATTAAAGAAATCTTGACATTTAGTAGTCTTAATGCACAATCTGCAAAGCCTAATTTCCAAATTGCAACAGTTTCCATTAAATGTATTCAGGTCTTATTAAAGCTTTTGTGGTAGACAAAATCCCATTAATTAAGTTTTAAAATTAAAAAGTTTCAGAATTAGTTTATCCCCTTGAAAGTAATGGCTATAGATTAGCAGAAGATTATAATTCTGAAGTAGTATCTGATGTTAAAAGTAATTTTAGGAGCTCCCAGCTTTAAGGAACTAAATTTAGAAATCATTACAATTAATAACACTATTGCC…	TGTCATGGATACTGTAAGGTCTTTG	TGGAAACTGTTGCAATTTGG	118	failed
AV0091	ga	7	TTCACATCAAAACATCTTAAATTACTTTGGCTgagagagagagagaCGAGAGCGCCATCTATTTCAATCAGAAATTATCCACCCCAACAATTGAGTGACGAAACTCTTCCTAAACAAAAAACTTTTCGCCCTTCGATCAATTTAAACAAAAAAATAAAAAAACAAACACGACACGCACACACTCATacacacacTCACCCACGCACACACTGATT	TCAAAACATCTTAAATTACTTTGGC	TTCGTCACTCAATTGTTGGG	96	passed	6	no
AV0092	accta	7	CTTGTCCTTTCTGTCAAAAAAATCAGATTACAGAAAAATCGTACAGTAGTTAGAAATCTGGAGAGATCATCTGTCGAATTCAGGGCTCTTTGGTGAATATTGGTTTAGGAGACTGTTTAACCTTTGTTCCGCTCAAGCACAGTAGTTAGAATCTGGAGATATCATCTGTCGAATTCAGGACTCTTTGGTGAATATTGGTTTAGGAGACTGTTTAGTCTTTGTTCCACCCTAAGCACTTAAATACCCGGAGAACGCCAATTGGATAGCACTGACTTACCGAAAAGGACGAACAATATACGAGAACTacctaacctaacctaacctaacctaacctaacctaCTCCTGATTGCCTATTGTACTTACAATACAACAATCAATAGAAATAGAAATAGATAGAT…	TTCCGCTCAAGCACAGTAGTT	TGTAAGTACAATAGGCAATCAGGA	239	failed
AV0093	ca	5	CAAACACATGACTCGCATACTACACAGTCAAACAAACACACTCAACCAATTCACTCAGACATACATGCAAACGGACACATACACTCTCTATATACACACATACACACATacacacacacacacTCAAATATAGGCACTAACAAACACACTCACACATACATGCACCCACGCATATACACCCACATTCACAAGCAAATGAACACTcacacacacaGTCAAGCATATACACTCACAAACTCACTCTAGACATGCATGACAAATGGACACGATACACCCGCTCTCTTCCAGACAAGCACATACACATACACAAAGACAT	ACCCACGCATATACACCCAC	ATCGTGTCCATTTGTCATGC	107	failed
AV0094	tga	18	ACATTAGGAGGTTATGACGACCGAACCAGCAAGCCGGCTAAGTTAAAAGCTGCTGAAGATAAAACATACTACATCTCAAACAAGACAGTATCAATTTTCTCAAATTATGAAGAAGTAGCAACTGACTTCAGCCATCCTGAAGGGTTGGATAGTGATGGTGGGGtgatgatgatgatgatgatgatgatgatgatgatgatgatgatgatgatgatgaTTACACCAAAACATCTAACCGTGACTTCGTCTAAGATGTCCAACACAGATGTCAATTGTAAAATGTACCAACGTAAGTATTTTACTTACTAAAATATGATTTCAACTATTAAAATGTATCTACTTTTAATTTCCTACTTAAATTGTTCTAGTCTTGACTTCACCTATAAA	GCAACTGACTTCAGCCATCC	CAATTGACATCTGTGTTGGACA	158	passed	4	no
AV0095	ct	7	TCTCCACCACCTCAACCTAGCGATATCCACCCAATGCATTTTGGTCCTTACTCCCACTCTCACActctctctctctctCACTCTGTCATTTCCTATTTTATCTCTTATGGTTTTCCCCACTATAGAGCTCAGCATCTTTATCTCCGCAGCTTGATTCCTCTCCTCCTCTCTCCCTGTAGTGCTCCAAGTCTCCGCTCCATACAACAGGGTGGACAGCAAGATGCTCTCGTATATCATCCTTTTAATTGACATGTTCATTTGTTTATCTCTTATGGAGGGGGTACGAGGCCTCCC	CAACCTAGCGATATCCACCC	AGCTGCGGAGATAAAGATGC	139	failed
AV0096	aac	5	GAAGAAACTTGAAATCAAAAATAACATGCAAGACCACACTTTGGTGAAGATAGTAGAAGCCAGTATACTGAAAAAATTGGCATAAACCAGCTATAAACCATTCTTcaacaacaacaacaaCCACCACCATTACCATTGCATAAACAAAAGTAGGGGAAAAGCAACTAAAAAAAGGAAATATTTTAAAGTAGGTAAACTTTATTTTCTCAGTTAATTATTGAAGCATAAGTAAACAAATCCACAAAGTTATTACCTGAAACTCCACTAATCAGCTTATAAGCAAGAATACCAAACTAAAGATTTCAAACTGTTAGACTATGGGTAAGAGCTCATCAAAATGAAATCAAAATTTCAATTCCTAAAAGaaaaaaaaaaTAAATAAATAGAACTTAAACGTTA…	TGGCATAAACCAGCTATAAACC	TAGTTGCTTTTCCCCTACTTTTG	90	passed	6	kit #1 (6_FAM)
AV0097	gt	6	AGGGAGATAAGTATGTGGAGTGTGGTAGGGAGGATGAGAGGTAGGgtgtgtgtgtgtTTTGAGGGAATTATGGCGGGAACCATCCTATAATTGACAAGAGAGGAAGTGGGTGAGAAACTAGGGATTTCTAGAGAGGGCAGAGGATGTGTGAACTAGGTGTTCACACTGAGAATGATCGGTGAGCAATTACGTAGAAAAAAGATAAAGTGAAAAGTGAGTTGTGCATGTTTTGGAAAAAGGCATG	AGGGAGATAAGTATGTGGAGTGTG	ATTATAGGATGGTTCCCGCC	91	failed
AV0098	caa	5	ACAAATAAACATTGTTCACTGAAATGTGATATTTCTTCAAGTAAGTTTATGTGATCATAGTTGACACAAAATCATTGTTATACCTTAAGAAACAAAATTTTGTGAATGACTATTCAAGTTTATGcaacaacaacaacaaAAAAGCACCTCGGTTGTAGCGATTAGCAGCACATTCTGAAGCATCTCTCCGGCAGAGGCAATAAACATTACATGGGAAATCATAGAAGATCG	TGTGATCATAGTTGACACAAAATCA	GCTAATCGCTACAACCGAGG	117	failed
AV0099	tg	8	AtaaactaaactaaactaaactaaacTGGAGTATATTGAAAAAATGAGATTTTTGACTCACGATAAAATTATTGGTAAATTTGATATTTAAAGAAACCTGCCTTCAGCATCCCCATTTGTGCATGTAGTGTATGTATAtgtgtgtgtgtgtgtgAGAATGTTTGCCTTACATTGCTAAACAGATCTGGAGTAAATTACATATGAGACACTTTTAGATTGATTTTAGAATCGTGAATAACGTAAAAGTTGGGTAATGTAAGCGAGGGGTAGGCGGCGTTGCACAGCTTTGAAATTTTACGCACAATATGAGACC	CCCCATTTGTGCATGTAGTG	ACCCCTCGCTTACATTACCC	158	passed	5	kit #2 (HEX)
AV0100	gt	5	GTCCCGATTTTTTTAGAGACGGACATTTGTCCCGATTTTTAGATTTGGCAAAAATTATTTATTCAACCCTATAAGAGGCAAATTAATAAATATAATTCTTACGAAATATTCGAAAGAGTAATATCGGTTTCTGTGATAAAATAAGTGCATGAGCGAAGAAGTAGAAAAATTTCAAAGTCCTACTATTAGGATAACGGCTGGAGTTCTTTACGATGACAATTTTATGAATGCGGGTAGCGTAGTGATGTCATCGATATAGTTGTGATGGTTTGTATGTACTTGTGTATGTGTGTATGTATTTATGTGAAAAGAGAAGGTGGTGAAGACTTTATTTGGTAACAGTAATTAAAgtgtgtgtgtATTAATCATGTTTAAGTGTTTTACCACGTGAAGG	TGTGAAAAGAGAAGGTGGTGA	TTCACGTGGTAAAACACTTAAACA	90	failed
AV0101	ca	9	CCATCACAAGTCACAAAACATCATTTCTCGAATAATCAAATCACAAAACACATGcacacacacacacacacaAAACATTTAATTTTAACAGCACAAACCACAAAGCACCATATCCAATCACATTTTCCATAAAAATCAATTAACTTCAGCAAAGCAAGTCACAAAACAGCAAGCTCAAATAAACAAATTACAAAAACTCTCATAATTCATCATCACAATTCACAAAACAGCCCTACCCAAGCATACAAAGAACAAAATTTACATGCCTTCAATAACACAACCACAAAAACAACAACCTTAGTACAAACAAAAAGCACAGACACATACACACAAACACATacacacacG	TCACAAAACATCATTTCTCGAAT	TGCTTTGTGGTTTGTGCTGT	97	failed
AV0102	ct	5	TACAAATCCACTGTACTCACGAGTGCAGTATTAGTAAGTTAACACATCCCACTACACTCGTGAGTGCAGTGTTAGTAATATAACGTATTAACACAAACGGAAACCTACTTGTGGGGTACTTGAGTTATCTCCctctctctctCGCTATAGTATATTTACTTCATAACAGTGTGAGTGTTTCAACGACGTTACATTTGTTCGCTTGAAGAAATATTGGTTTGATTAAGTATTCGTCAAGTTCCGATTCGTTTTAATTTAGTGGCTTCCCGGATGGCGTTCTTTTACGTTAAAGTGCCATTTTAATATAGCAAGAACAAATAAGGTTCTATGTTCTTTTCGTATGGCTAAGGTCCTTTTTAACAGGGTCTT	ACACATCCCACTACACTCGTGA	AACGTAAAAGAACGCCATCC	247	failed
AV0103	cag	12	TAGTATTTTCCTCTATTTTTTCGGTTTGTGTGTAAATGGATGATTTTATTACTTTTTATTTATCACCGACGCTTCTTTCCCATAATCGGATGGAGATAATTCCATTTCTTCCACTACTCCTTCTCCCGATTCAAAATCATTATTATCACCATCATCAGCAACAAcagcagcagcagcagcagcagcagcagcagcagcagCGGTAATAACATCAGATCGTTTCCTTCCGCATTCTCCTTAAAGGTGAAAGCGCTGCGTTGTTGTTTTGCCTTTCTATTTTTCTTTATAATAGTATAACTCGACCGATTTTGCGTTTTTCATTT	TCCACTACTCCTTCTCCCGA	CGGAAGGAAACGATCTGATG	120	failed
AV0104	gtt	5	AGATCACCAGATTGGTTTAAAGACTTTTCTAGGAATTCTTGAACgttgttgttgttgttTCATGTTTTCTGATATTCAAATCTGCTAGAGATGATGTAACAGGGAGTAGAGCTTAGTCACGTGATTTAGATGAACTCTAAAGATAAATATACAATGAATCTTGAACTGATCTCGACACACTCAAACTTAGTTACGTATCTGGCTCTTCGATCTGATTTGGTTCCAGAAAAAAGAGAATTCGACAATTTATCTGCAGTCTAGATCTCAAGAAGGTTTTTTCGTGGTCTGAATAAATCTCAAGAAACAGATTAATAGTCACTGCTTTCTTTTCACGCAACCCTTCAGCTATGGTC	AGATCACCAGATTGGTTTAAAGAC	CGAGATCAGTTCAAGATTCATTGT	174	passed	2	no
AV0105	ag	9	AAGACGATCGAGGAATACTGGAAGGGAAATGCATTGACATCTTAAGTATGTTACGATATAGAGAATTTGGTAAATGATTATCTATTCAGAAATTAGGGTGAGCCACTGGCAACGATGAAAACTGAGGGAACTCAGAATAACAATGTCAGAGAAAGAAAGGATCTTTTGGATTAATTTAGTAAACGAGTAACGTGGAGTTTAGATTGTTGAGAATCAAagagagagagagagagagATAACAATGACAAGGGAATTTAGTCCAAGATTTACAAGAGAACTGAGTTCTTTGATTGAAACTTTTTAGGAGAACCTCATGTTATCGTAACGTGAGAAAAGACTCACAACATTCTCCTTTGAATGAAGTTGAGGACACAGTCCATAATTAGGAAAAAAATACAG…	TGGCAACGATGAAAACTGAG	TCTTGGACTAAATTCCCTTGTCA	159	failed
AV0106	ac	8	TATCCTTAAAACAATGAAACTTGACCTCCAAGCACGCACATTCTCCTTTTCATTAGTATAAGTACATAGTTGTGAACGTAATTTATCTTTAGTGCATTCATACAGacacacacacacacacTTTGACTTCGAATCTGACTCTTGCTCCAACTTTGACTTCGAGACTGGCCCCGACTTTTATTCAATCTGCGTCTGCATAATCTTGGCATTCTCTTCCTCTTACTCCACCTTAAAGTTTGTTACTCCAACGTGTCCGATTTCAACATGGATATCAACATCCCTGGTTATAATATTGTTTTCAAAACACTCTAAAGATTATTATCACCATCCCTGGTTATAATATTGTTTTCAAAAC	TGAAACTTGACCTCCAAGCA	GAAATCGGACACGTTGGAGT	247	failed
AV0107	gt	7	GTACATCACTCGCTCATGTACGCTAAAATTCATCCCATAATATGAGTTTtgtgtgtgtgtgtgtgAGTACAACACTCGCTCATGTACGCTAAAATTCATCCCATAATTATGTAGTTTGTTTAGTAAtgtgtgtgtgtgTACAACACTC	CATCACTCGCTCATGTACGC	AATTATGGGATGAATTTTAGCG	105	passed	3	no
AV0108	aga	5	CCCTTTACAACAGTTCTCGACACTACGTGAGTTACTTATGAGCCAACATTATACCCAAAGTCAACAAcatcatcatcatCAACCacaacaacaacaacaacaacaGCATCACGTTAGTGGGATACATATTTTTCCGCCGCTTTACGAGAATACTATCCACTTGACAAAATCAAATGATATAACagaagaagaagaagaAGTAAATAACGTTCCTGAAGATTCGTTTTCATCGATTTCTGAAATAC	GATACATATTTTTCCGCCGC	CGATGAAAACGAATCTTCAGG	112	failed
AV0109	ca	6	CTTGTGTTCAATAGTATCTGCAACATTTTACAGGCACTCAAACATCAGGAAACCAACAATcacacacacacaATTTTCCACCGAAACATCAGGAAATCAACAATcacacacacacaATTTC	TATCTGCAACATTTTACAGGCAC	ATTGTTGATTTCCTGATGTTTCG	90	failed
AV0110	ga	8	CTATTGTTGCTTTAGCTGTTGTGGAAGTTTCATTATTGTTGATTTTGTTGTCAAAAATTGCACCTGACCGACACTTGATGGTCATTTCTATTGTTTGAGTTTTATCAAAATCACAATTGGATTgagagagagagagagaGCGTACTGTCCTGATGGTATCACTCCTGTCGGTTTTCAAAACTTGTGCTCACGAGCTTAGTCCCTGCTATTGTAAACGATATGTCCTTCTGTTTAAAATTTCCCTTCTTGCTGGAAACGTGCACTCATGCATACTGTGCCAAAAGAAAAGGAACTCTTCTCATCCTTTCAACTACAATCACATTCCTTTAACCTTCGTTCTTTCTTAAATTTTTTGAATTCTATCCTCAATAGAAAGAT	GCACCTGACCGACACTTGA	ATTTAAGAAAGAACGAAGGTTAAAGG	290	failed
AV0111	ac	8	GACATCACAACGAGTGTCGGAAGTGATCTCCCTTAGCATCAAGGCATGTCTGCACACGCTTTTCCGTGCTAAGGAAGGTTACCGCCAACATATTAGAGTCACAGCGTCAATTGCTTGCCGAATGTTCTCTATCAGTTGCATGAGAGTACGTGGCTTGATGTAATACACTTTTCCTTTCGCATGCCCCACAGGAAGAAATCCGGAGGGGTAAGATCAGACGACCTTTGTGGCTAAAGTCCCTTGCAAATGACCCAATTTTAACAGAAGGATCAATTTCTTATACGAACGACTGTCCCGCGATTTCTCATGATTCCACCTCGCTTCTCCACCAATGTTTCGTCGTAACAAATTTTATTAACTTATGACTTATGACCAGTACTTTGACACAGAACACAacac…	TTGCATGAGAGTACGTGGCT	AGGTATCCCATCAATCTCGG	314	failed
AV0112	ac	21	CTAATTCTGAAGCAAACACTTCATAAATTTAAGTATTTAAACTAGACACAGAAATAGAATTAAACTTGAGATGACTAAACTTTAACAATTAAACTTTTAAacacacacacacacacacacacacacacacacacacacacacAACTTAAAATAAACGTAGGGAGAACTAACACAGACGTCCGTACTACTAACAACAACTATCCAACAAATATCAATACGAGGTATTTAGGTTAAGAACAAGAGGCGAGGT	TTCTGAAGCAAACACTTCATAAAT	CGTCTGTGTTAGTTCTCCCTACG	174	failed
AV0113	ga	6	TGACTCAGTAAGCAAAAATATCTCTAACCTGAACAGAAATTACAGCTTCTTAGAGGCCGCTTTAGCTAACCATTTGGTGATAATGTGGTTTCCAAGACAGTTTGTTGTTTATGTTTAGACCAAGAATGTTAATGTTATTGCAGGTGAGAAGGAAGAGGATAGGAAAGTTGAGAGTTGTTTTgagagagagagaTGTGAGGTTTTAAAGAGTTGAATTTCACAAGGTTGCTATGAACCCACCGAGAATCCCATCCAGATTGGAAAGATAGAATCGGAAAGTTGAAGACGAGAAGCAACTCTAGAAG	TGCAGGTGAGAAGGAAGAGG	GGATTCTCGGTGGGTTCATA	111	failed
AV0114	ga	5	AGAAGATAAGCTTTCAAAGAGTTGAATTTCACATGGGTGTGGTAGACACACAGGGAAATCCCATAAGATCGGCAAGAATGGAATCAAAGTTGACGATGAAAGGCAACTCTAGAAGTAAAAGAGGGAGCATATTTGAAATGAGTAGAAGAATGGAGAGTTGAGAATGAACAGAATTAGAAGTACCATTGAGAAGGTCGCTGAGGAAATGTAAGAATAAAGTgagagagagaACAGAACCCTGAAGAACACCAAAATTAATATTCCATCAACAAGTGCTGATATTTCTGGATTGGTTGAATATATGCGA	ATTGAGAAGGTCGCTGAGGA	AACCAATCCAGAAATATCAGCAC	111	failed
AV0115	gga	6	TTTGTATTAAGAAAGATTAGAGACAGACTATTAGATGTAAATGTGTTAAGAGGAGCAGCAAGAGGAATTTAGGTTTTATTTGGTGTTAGGTAGAATTAGAATAAGGGGAGGATGGAAGAAAACTGAAGGTTGAAAGATTggaggaggaggaggaggaGGGAGTAGGGGAGCATTTCAAAAGAAAGGCTATTTTAAGATGGGATGAGGTAAGAGCGAGTGCTGTTGGGGGAGTGGAGGAGGAATGGGAAAGGCTTAGGG	AAGGGGAGGATGGAAGAAAA	CAGCACTCGCTCTTACCTCA	120	failed
AV0116	ttg	5	GGTATTAAAACTACATTCTTCTTGAAGTTCGAGTATTTGCAACAAAACCATCAGAGCAttgttgttgttgttgATGTGTTAAAAGAAGTGTTTTCATATAGGCTTAATTATTATGTGGATTTTCTATTAGGCAGAAAAGAGCTAAAAGCAGTACTGTGACCCCAACCAAAATTTTAAGAACAAAAACAATTATCTAGAACCCATCTAGTTAGTGTATTATTTTAGCCCACAAAGTTAAAACAATAAAATTTAACATAAAAGAAGGTTACTCACCAAGGACATAAAAGTTTGTCAGCTGCAATAGTAAAGGTTTCTAAAAACATATTTGGAGATACAGTTTTAAAAATAAAAAATTTACATTATCGATAATACTGATAATTATGATAAATATAATCATTT…	TGCAACAAAACCATCAGAGC	AAATTTTGGTTGGGGTCACA	137	failed
AV0117	tc	9	CCCCTCaaaaaaaaaCAAAAAATTTAAAAAAGTACTgagagagaCGAAAGGAAAATAAAATTTTTAGTAGTTTTAAAAATTACGAAAAAAGTAAGCGAAAAATACTTAAAATAGTAGCCAATGTGGCGAGAGTATATTTTATGAATCTCATATATGGTTTTTGTCTTTAACTTCAtttttttttCCTTAACAAACTAATTCGACTTAACCTAACctctctctctctctctctCCTGCATTGTTTTGGTATGATTCATCAAAAGTAGTTTTCTTTTAGTAATTTAGAAGTCATCTGTGTCTCC	AACAAACTAATTCGACTTAACCTAACC	GGAGACACAGATGACTTCTAAATTACT	114	failed
AV0118	agg	5	GGGCATAGCTGTTAAATCTAGGTCAGGTGTAGAGAAAGGAGGAGACTACATTTTGTGGAAAGACTTAATGCACGGTCTGTCCCAAaggaggaggaggaggTATGAGACTAGAGTTCAGAAGAGCAGTGCCCGTTGTAATAGATATAAGGAGAGTAATGCAACATTTCGACGGGGGCATAAAGGAATCAGAGTCGGTgagagagagagagaATTGATCAAGACAAAAAATTACTAAACCCAACTTGTACAAGAAAACCATGTGAGCGGAACCACCACAGATACGTGATGCATACATACTTCACATAAAGTGAACGATGCCCTATCATGGAGTAAGCTGCTG	GGTCAGGTGTAGAGAAAGGAGG	GGGCACTGCTCTTCTGAACT	111	failed
AV0119	ga	7	GCTACAACAGACGTTGGACCTTTCCATGTCATACAGGAAGAACTAAGCAAAAGAGAATTTGAAAACATGTACGAACATGAAAATgagagagagagagaGCTACGTAAATAGAAGAAAGCAAATAGAAGCAGAAGAGCTGCAGAAACTGTAAGAACAGGCAATCTAGGTACAACTAAAGCTCAGAACTCCGTACCAACTAG	ACGTTGGACCTTTCCATGTC	TTTCTGCAGCTCTTCTGCTTC	135	passed	5	no
AV0120	aca	6	tgtgtgtgtgtgtgtgtgtgTTTGTTATTAGTATGTTCGTGAATCtgtgtgtgtgGAGGAGGGAAGAATGTTATGTAtgtgtgtgTTTCTGTATTCTCAGAACTAGACCTAACAaacaacaacaacaacaacaacAAATATTGTATTGATAAAGGATTAAGGATGGTTAGAAAGTAAATGATTAATCGTATAATCCACACAACCAAAATNTACTAAAAATATTCCTTATGTAGCCTAAGTATAAGGTACGTTTTGATTCTGCT	ATTCTCAGAACTAGACCTAACAAACAA	CGATTAATCATTTACTTTCTAACCATC	96	failed
AV0121	tc	5	TGCATAGATTTCATTTTCAAAGTTTCTCTGATTATTAAATCGCTATAAAGGGAAAAACCGTTCATCCGATTAAGTTAGGAGAACTCTTCGAATAGTGTTAACTTAGAGTCCGATATTTGACCTCACCTCCGATGACATCCAATAACTTCGTTTGTTCATCCTTtctctctctcACACATACAATCTTACTCTTACTCTACTCTATCAATCACTCTTTCTCCCTTTCCCATCTCTTTTTTTCTTCTCTCTTTcacacacacaCTCTTACTCTAATCTATCAATCACTCTTTCNCCCTCGCCCATCtctttctttctttcttTCTCTCTTTTCTTAACNTATACGCACACATAGACGCTCACTTTTGTTGTTCTTTCTCGCTTCACCGAGCTCTCCATTTC…	ATTTGACCTCACCTCCGATG	TGGGAAAGGGAGAAAGAGTG	115	passed	1
AV0122	gga	6	CAACCCACACGATAAAATATAACGATGGTGGTTTAAAAAGAAACCAGAAGATGTGATACGTAAAATGGAGGGAGTACTTTTACGACCTTTATAGCCAGGGTGTGGAGGAGGGGAGAGATTGGGGGCGGACTGTGTTGGAACAGCCCAAAGATGAGCAAGACAAAATCCAAATATCATTggaggaggaggaggaggaGGTGGAGATTGCTATTAGAGGAATGAAAATGGAAAAAAGATCTAGGCTTGGACTGGCTACCCGCAGAAATATTCAAGGAAGGGAGACACATAATACAGTGGATGCTAAGATT	TGTTGGAACAGCCCAAAGAT	TCATTCCTCTAATAGCAATCTCCA	90	failed
AV0123	ag	10	ATTGTACAACCTTATGACGGTGTTCCGGAGGTGTACAATCGTATCAACCTAATCCTCTGCATGTTAATCCTCCAGTAGAAATAGAAGGATTAACTGTGGTAGTAGTAAAGGTAGTAGTCGTAGTAGTAGCAATGGTAGGATCAGGAGGTGGTATTATCCTTTTCATTTTTGGGTCAAATCTTGCTCCAAAATAGTGTTCAGTACTAGCTTCGAAATCGTCAATAAGTTTTTGAATTTTTGAGTTTACTCAAATTATAGATTTGCGATTTACATTTTGTTAGAATGAAATCAAAATTATAagagagagagagagagagagAAAGAAAGAAGAAACAGGAGAGTAAATAAGAGGAAGAATAGGAGTGACTCTGCGGCCGTA	AGATTTGCGATTTACATTTTGTT	GCCGCAGAGTCACTCCTATT	119	failed
AV0124	ac	5	AATGAAACTTTTTAAAATGTTAAATGGGTTCATAAAATAGGAGCATCACTATAACATACAATAAATTTTAAAACTGACAAAATTTTCATATTTTTAAATCCATTCCAAACACTTacacacacacATACAAAAACAAAAGTTAACTTACAGTGAAAAGTATAAAGTTTTGGGATAGATATAACTACTTCTAGAAATGTATATACTATTACAAAAGGTGTGAATCCAGAATCCTTTTACCTCAACTCAACTCCCGACC	TGGGTTCATAAAATAGGAGCA	TCCCAAAACTTTATACTTTTCACTG	148	failed
AV0125	tc	6	CTTGAAANGAATTCCTAAAGATTTATTTTTGGAGAACAAATCTCCCCTCCCCCCAtctctctctctcCCTCCCTCCTCTATCATCGCATACCTCTGGCTCTtctctctcCTATATCATTAATTATCACATACCAGTAACTCTCCCCTCACTCACTCTCTTTTCTCTCCTTTATCATCACAACCACTGCCCATCCTCTtctctctctctcCTATATGTTCACATACCTCTGAATCTCCTTTCTCTTTTTGTATCTCTTATCTCTCTTTTGTAATCACACACCACTGGCTACCATCctctctctctctctctATATCACC	CCAGTAACTCTCCCCTCACTCA	GAAAGGAGATTCAGAGGTATGTGA	110	failed
AV0126	ctc	5	ATGTGGCCACGATAATGATAATAATTTGATCGANACTAAAATCTACAACTGGAAAAACGTAATCGAACGTATATGCGAATTAAATATTAAAAATTTNCTTTTATACGGCACCGATATCGATATGGTATTTTNCCCTTCATTCATAGACTCTCACGAAAAAGCTATCTTGTCCGATATATTATCGCGAAGAGGAATACGTGAAATACCTTctcctcctcctcctcctcTTCCCGCCGCCCCTCCTAGAAACATTGACGATCCAAATTTAATCGTATTACAAAAAAGACAAAAAATGAATAATTTCAGCATCCCGGGGCG	ATCGCGAAGAGGAATACGTG	CGATTAAATTTGGATCGTCAA	92	failed
AV0127	gat	5	AGCTTCTCCATCATCCCCCATCTTCTTATACggggggggTTTCCTTCTCCTCCTTCTCCTCCCTCTCTttcttcttcttcttcCTCCTCCTCTTCCAGCAAACAACCGGCGCACGTGAAATCTTTGTAAAATAAGGGTGGACAGTTATCGCGCCTAATTTCTAAACTCTCTAAATTTGGAAACGTTTTAGCAATTTTCGTAACGATATAATTACACTGACAAAACGAATAGATCGTTGGACTTTCTTTCGAACAGGCTAAATCGAATCCATTATAATTCATTTCGTGGAACGTTATCGGCAGGTTTTCAACGgatgatgatgatgatGTATAATAATCACCACACTCACAAATATCATTCGACGGACGTTTTTTCACGGCGCACGTGAAATCTTTGTAN…	GGAAACGTTTTAGCAATTTTCG	TCCGTCGAATGATATTTGTGA	189	failed
AV0128	gat	5	AGCTTCTCCATCATCCCCCATCTTCTTATACggggggggTTTCCTTCTCCTCCTTCTCCTCCCTCTCTttcttcttcttcttcCTCCTCCTCTTCCAGCAAACAACCGGCGCACGTGAAATCTTTGTAAAATAAGGGTGGACAGTTATCGCGCCTAATTTCTAAACTCTCTAAATTTGGAAACGTTTTAGCAATTTTCGTAACGATATAATTACACTGACAAAACGAATAGATCGTTGGACTTTCTTTCGAACAGGCTAAATCGAATCCATTATAATTCATTTCGTGGAACGTTATCGGCAGGTTTTCAACGgatgatgatgatgatGTATAATAATCACCACACTCACAAATATCATTCGACGGACGTTTTTTCACGGCGCACGTGAAATCTTTGTAN…	TGTCGTTGTGAACAGGCTAAA	CGTCCGTCGAATGATATTTGT	128	passed	4	kit #3 (6_FAM)
AV0129	ca	8	GGTCAGAGCACTGAAATTTTAAGCTAAAAATTAGATATAAATTTATTTGAGGTTTATTTAATTATAAGAAATGCGTAGAATAGCCAACATTCACTTAAATTATCATTCTTCTTAAATCGCGTTGGAGATCCCAACCCTCTAATCAGAAAGCCAAGATTCTTAAGTCTACACCTACAACcacacacacacacacaCGCAATGTTTCATGTTCTAACTTGTGAAATATACGTATCCTATTATAACTATTTTTATGTATAACATAGAATATTTGCATCATATTTGAATGTTAGAAAAATGGATTCTGCTAG	TTCTTCTTAAATCGCGTTGGA	CACAAGTTAGAACATGAAACATTGC	115	failed
AV0130	ca	5	CAGACAAGCACATACGCATACACAAAGACATAAACACGcacacacacaGTCAAACATACGCACTAACAAACAGACTCCCACATACATGCACATACACATGCTGATTCACATAAGCACATACGCACACAAACACAAACACATGAACACGcacacacacaGTCAAGCATACACACTCACAAACTCACTCAGACATACTTGCAAATGAACATACACAGGCTCACTTCTAGACAAACACATacacacacacAAACACAAACACATNGAACAAGcacacacacacaGTTAAACATACACACTCACAAACTCACTCAGACATACATGCAAATGANCATACACAGCTCACTTCAGACAGCACATTcacacacacaTACACAAACN	ACAAGCACATACGCATACACAAA	ATGTGCATGTATGTGGGAGTC	90	failed
AV0131	ga	9	GGATGGGGACAGTTTTTNNTagagagagTAGGGGATGTATGGATCAGGTGTTTAAACTGAGAATGATTGTTGAGAAATTGCTTGAGAAAGGTAGAGTATGTATGTTCTATGAATCTGGAAAAGGCATATGATAGACTTTGGAGGAGAAAGCTGTTTGAGGTATTAAGTGAGATCTgagagagagagagagagaTCATTGAATAGGATCAAATCAATTTATGAGAACTGTAGAGCGAGTGAGACGGTGAGGTGGGATTTGATGGAATGGTTTAACGTGGGAATTGGGCTGCGGCAGTGGTATCTTATGTCGCCGTGGTTGTTATTTGTGTTAATATATGGTGTTGTTAGAGGGATGGAG	TTGGAGGAGAAAGCTGTTTGA	TCACCGTCTCACTCGCTCTA	111	passed	3	no
AV0132	gt	22	CATCGTTGTTTTAATCCTAAAATTTGCATCGTAAAAAAATACATGGATAATTTATTTTGGGATGAGGTAAATTGAAGTAATGACTATTGACAACCTATGTTGTAAAACgtgtgtgtgtgtgtgtgtgtgtgtgtgtgtgtgtgtgtgtgtgtGNTTGGCGCATGCGTGCGTGTGTAGTAAATAAAAAAGaaaaaaaaaNAANNAAGAAAAACAAAAGT	CATGGATAATTTATTTTGGGATGA	TTTACTACACACGCACGCAT	140	failed
AV0133	ga	8	CAATTCATTCAAATATTTGGGTATGAAATTTTTTGGGGACAGGGATGGTAGTGAATGAGAGAAAGTAGGGTATATTATTAAAGAAGgagagagaGTATTTGGAGATATTTGGAAGATAAGAAGGTTGACAAAAGAGGTAAAGAAGAAAATGTTTGAGGGATGCTGTATACCGATGGTTTTGAATgagagagagagagagaTGTGGAAATTGAATGNCGAAAGAAAAGGAAAAGGTTGAGGTTTTNCGAAATGAAGGGTCTGAGATCGATATAAGGTTTAGGTAGAAAGAATAGAGTCAGGAATGTTAGAATAAAGGAGATATGTGTCTAGGAAAAGGGGTTTGGTTGGGGGAGCTAGAAAAGAACATGCTGAGGTGGTTTCGGCATGTTTGAAGATGAA…	TTGGAAGATAAGAAGGTTGACAAA	TCATCTTCAAACATGCCGAA	290	failed
AV0134	cag	5	ATCTTCTCGTTTTTCGTTCCGTTTTCTCTCGGATACATTTTACCCATTTCAGAATTTGAATAAGTATCAAACCCCGAATAGAAAAATTTACGAAAAGACGTCGATTCGTTTCAAATTGAGGTTAATGAAACAGTTNNNNNNNNNNTGGATCGACAAcagcagcagcagcagcagcagcagcagCGACATTTTCCGCATTTTTACCACCTCCTCCACTTCTCTTAATGGAATCTATATAATTTTTATAATCTCTTAAGCATTCATCATATAAAATTTGAAATGGTCGATCTTCGAAAAGCGTCGATTCGTTTCAAATTGAGGTTAATGAAACAGTTTTCATACACCGTGGATCGACAACATcagcagcagcagcagCGACATTTTCCGCATTTTCACCAC…	ATTTGAAATGGTCGATCTTCG	AGAAGTGGAGGAGGTGGTGA	140	failed
AV0135	ct	7	ATATGACAAACAAATCTCTATACGATAATCTATTCTAAATGACTTACTTTCCTAAATGTAAATTAGGAAGTAAATTTATGTCTATGTTTATACTTTATTTTATGCAAATAGTAAACAAAGAAAGACTAAGAAATTATACTTGCAAATAAGATTAAACTGCCAAActctctctctctctCAACGAACCGTGCAATGACATCCTGAAAACATTAACTATTGTGTTTTAAAAACGCAGCCTAATAGTAACAACCGCGAAAAAANGTGTGACGTCACTGTTAGATCGTAGGCAATGTTTTATATTCGCCCTGAAAATTAATTAAAANCTTGCTATATTTAAATAAACAAATTCCGAAAATAATTTTCAACTTTTCGATTACCGTTTCAAATAAACCTTCATAT…	TGCAAATAGTAAACAAAGAAAGACTAA	AGGATGTCATTGCACGGTTC	100	failed
AV0136	tgt	5	ATCTCCTCCTCCACGTCGTTTATTTGCAACAAGAATTGACCAAATGGCGATTCGTTTTCAAAATATTTTAAAATTAGTTTCTTTCTCTCGCTTTCCTCATCCCCGCATAATTGAGAAACATATTTAATAAAATGCTTCGGTCGTTTCGAAAAGGCGGAGATAATGATGGtgttgttgttgttgttgtTAGCGGTGGTCGATCCGAAAACAGTGTTACATAATCGCCATCTTCACCACCTCCATCTTCCGTCTCGTTCTGCTGATGGCCCCCTTCGTGGTAATgacgacgacgacGTTCTCCTCCTCCACGTTGTTTATTTTGCAACAAGAATTGACCAAATGGCGATTCGTTTTCAAAATATTTTAAAATTAGTTTCTTTCTCTCGCTTTCCTCATCCC…	CGAAAAGGCGGAGATAATGA	GAACGAGACGGAAGATGGAG	111	failed
AV0137	ta	6	CTGCCCTTTGAATTGTCCTGCATTTNGCAGGATATGGTGTAGAGtatatatatataTGAATAGGACTTCAGTTATGATTCTTGATCCTTTATCTCTTTCTATTGTTCGCCACGGTAATCATCTCCATTCAGCTTCTTCCGATTCTCTCTACACACTTCATCCATAATTTTCTCTTTATTATGGTTTTCCtcttcttcttctATCCAGTGGATTCCACTCTACCTCATTTTCCCCAGACAGGCCNTGCAATTACCNTCAAAACACGTCCCNTCCCACTTTACTNNCCCTTCCACTCTCATCCNtctctctctctctc	CTGCCCTTTGAATTGTCCTG	CGGAAGAAGCTGAATGGAGA	140	failed
AV0138	ag	7	AATGATTAAAAAGATAAGAagagagagagAAAAGGGAAAGAGAAAGAGATAGAAGAGAAGCagagagagagagagAAAAGGGAAAGAGAAAGAGATAGAAGAGAAGCagagagagagagagAAAAGGGAAAGAGAAAGAGATAGAAGAGATGATACGACTCTAGGCTGCTTGCTGATCGATCGGAActtccttccttccttcCTTACCACTCGCTTGcttacttacttacttaCTTCCGCAGCANTAAACCGACCTGGTACTTTGTTTTNNATTTTTNCGCTGCGGACTCTGGTCGCACACGGGGCGAAAGGGANTCCAGTGAATATTCCGGAACCAGGCGCGGGGAAGATGTTTTANCGTGGGTTCGCGCACGTTCGATGCTCCTGGTAACGGGANAT…	GGGAAAGAGAAAGAGATAGAAGAGA	AGCAAGCAGCCTAGAGTCGT	95	failed
AV0139	gt	8	TTGCGATTAATAATTGTAAGTTCTTTAAATAAAACCACTTCAGAGAAGTTTCCTTAGTTGTTTTTNACTTCCCAATCCCCTCCCATAAATGATCTTTTTCACTAATTTGAAatatatatTTGTACCTGATAGTGTTTCTTGCTCTNCTTTAACCATTTCTTTCTGTACGGTTTTACATCAATTTACCCATTTTCAATACCGAGCTTGAAATGTTTATGGGCTAGGCCTATTTAgtgtgtgtgtgtgtgtCGACTCGTAGGTCTCGGGTTTGAGCTATTTGTAGATGAAGAAATTGATGGTTGTTATTTGTAATAATACACAGACAG	TGTACCTGATAGTGTTTCTTGCTC	TCAAACCCGAGACCTACGAG	152	failed
AV0140	tat	5	ATCTCAACGAANTTGTTCGAGAGTTNCGAGTGACTTTTCTTTTTNNNNNANNNGAATCGCGATAATACGGTTTTTTTATTATTATTTTAGGTTGCTCGGCATCGGCGACCAAAAGGGTTGTTCTCgttgttgttgttgttGTCGGTGGTGTTTGCAGAGGTAATTTTGGAGGGGGACACTACTGAGGTGGCGTTGGATGTGGACGtattattattattatTGGCTGTTACGGTGGCATTGGTTGTTGTGGTTTGCGGAACCCAGGTTGGCTGATTTGTTGTTTTTATGGAAGTTGTGGTTTNGACGAATCCGAAGTTTGTCTGCTTTGTTGTTGTTCTTGAGGTAGTTGTGG	CTACTGAGGTGGCGTTGGAT	ACAAATCAGCCAACCTGGG	100	failed
AV0141	tc	5	TCCGTCAGCTCACTACCTACCCTCACCCTCGCTCTACAATTTTCATAAAAGGATTTGGTCTCTTTCAACActctctctctCACTTCCCTCTCCCTCAGTACCTCAAACAACATCTTCCTATATACTCTATCATATGTCATTTCCAAGTCCANTAAAACATGCATACCTCACTATCTTTCTCGCGCAATTTCTCACCAATCATCTTCAGTGTTAAAGACCTGGTTCACCCATCCTTGCCATCTCTAAAGCCCCCTTGTTCCTCACCCNATTCTCCTTCTCGTGAATTCTTTTAGTCTCAAAACTAGTAACCTCCTATAAATCTTCCTCACCATACTCAACAGACTTATCCTAATATAATTCTTTCACACCATCTTATCCCTTTTCCCTTTTATATAGGCA…	CTACCCTCACCCTCGCTCTA	TGTTGTTTGAGGTACTGAGGGA	96	failed
AV0142	ga	7	CACCTCAAGGGAAGAGCAAATTAACAAGCACTCATAAAATCAAAGGACATATTACCATGTACTTTGTCAGAAAGAATATCTCCATTCATTCTATAATTATTGAAAGACACTACTGTCATTCGTGATAACCAATTACCAGGTAGAGAAACTAGCTAATTGCCAAGCAAGTTCgagagagagagagaATATGCATTCTATCAAACTCATTTAACCAATGTTCAGGAGGAATTATTTGCTATAACTATCATAATCTATCACATTCATAAAATTTCTTTGTGAAGAATATCCACATCAAAAGTCTGAAACTCTTTTAATTTGCTTTCTCTGACAACACTTCTTATCGTTACAAGA	CACCTCAAGGGAAGAGCAAA	CCTCCTGAACATTGGTTAAATGA	226	failed
AV0143	ga	7	GGTTGTGAGGAGGCTAACAACACCAAGAGGATCGTTTAGTTGATAGTATTGACTGCGTAGTGAGATGGCAACTTTATATCGAGTAAGTTCTTGAATTACCCACGACTTATGGAATAAGAGATATATTAGAAATGAATATAGCATGAACAAAGATAGTAAGAGACTAAAAGCTTAGCATATGTATGTGTTTATTNGTATGTATGCGTGTGCGAATGCGTGTgagagagagagagaGGAGGNTCAGTAACGTAGAAAGAAATTAAAGAATAAAAGAGAGGAAGGGAGGGAGGAGGAGAATCTAGACAAAAT	AGAAATGAATATAGCATGAACAAAGA	ATTCTCCTCCTCCCTCCCTT	171	failed
AV0144	gata	15	GAATAGTCGGAGTGACTATTCATTCTCTGTATAGACAAAGATTGTAAAAGGTGCATACCATGTCCCTTGGAGATGCAAGGAGTTTGCTTCTACCATAATAAAGAACTTACATGTTTCCgatagatagatagatagatagatagatagatagatagatagatagatagatagatagataGAAACTCTTAAAATAATTGCTTCTCTGAAATATCTAATCGGAAACTGTTCCTTTGTCTGTGTCCATTTGAGGGCAACTAATACGATTCACAACAAAGTAAGCTCAACCTTTTGAAATGTAGCTCTATGAACCCAGACCAAACCGCTANCTCTAAAATCTGGAATGCTCATCCACTTTCTATTTACATCNATTTCCTTNNGTACACATTTTCATATGCCGTG…	AAAGGTGCATACCATGTCCC	CCCTCAAATGGACACAGACA	205	failed
AV0145	tc	5	AGAGCGAGTGTAGCTTGAAGTGAGAGATGAGCTCTAACCTCAGCATCAACGGCAAAGAGGGTCACAAACAATAACATGCAAACAATAATATTAAGAGACTATTCACTTGAATTAAATGCAATGAATAAAGACATTATAATCCCTATTCCTTCGTtctctctctcTTTActctctctCCCTTCTCTTCCCCACTCTTCCCNTCCCTCTCACTTTCACCCACCCAACTCCTTCCCTCCctctctctctCACATTTGAAGTTACGATTTTGGCTTAGAGAAGACTGACCTATTGCGCTGTTGCAACAAAGAGAATATAACAACGGGACGGACCAAGTGGAATTAAGAGATTTATAAATCATCCTTCATGTTATACTGGCACAGGAATACGcacacacaGATT…	TTCTCTTCCCCACTCTTCCC	TAATTCCACTTGGTCCGTCC	162	passed	1
AV0146	ct	7	CTCCAATCTCTTTCTTCTCGTCGAGTTATTGCGTCActctctctctctctATACTATCGCTACTACAACGGACTACCGCTNCTTCGTGGACTCTTACGTCGCATACCTCCTCCATTGAGAAGAATTCGTGCGTTTACACGTACTTTCTACAC	CTCGTCGAGTTATTGCGTCA	CAATGGAGGAGGTATGCGAC	101	passed	1
